# Supplementary material
Source: publisher figshare collection journal article supplement (https://sage.figshare.com/ndownloader/files/14147696)
Supplement: Supplementary file 1 [file 14147696]

## **List of Online Appendices**

|                                                                        |    |
|------------------------------------------------------------------------|----|
| Online Appendix A: Data Collection Methodology                         | 2  |
| Online Appendix B: Additional Methodological Information               | 5  |
| Online Appendix C: Correlations for Subgroups and Interacted Subgroups | 8  |
| Online Appendix D: Models for Daily Data                               | 43 |
| Online Appendix E: Sentiment Outliers                                  | 47 |

## Online Appendix A: Data Collection Methodology

### Gallup Data

The Gallup Daily survey was a dual-frame random digit dial telephone survey. Data were collected for 350 days per year. See: <http://www.gallup.com/174155/gallup-daily-tracking-methodology.aspx> for a description of study methodology.

Presidential approval for Barack Obama was collected beginning on January 21, 2009, the day after his inauguration. Gallup did not collect data on approval on national holidays, some days preceding or following national holidays, and 27 other select dates (2/13/09, 6/19/09, 9/16/09, 12/8/09, 12/9/09, 3/19/10, 5/20/10, 10/7/10, 11/18/10, 11/30/10, 12/8/10, 1/10/11, 8/28/11, 12/15/11, 2/4/12, 4/25/12, 7/26/12, 12/20/12, 2/21/13, 7/17/13, 11/20/13, 12/5/13, 2/4/14, 3/6/14, 6/3/14, 8/7/14, 9/4/14). Gallup also did not ask the Presidential Approval question in the month preceding the 2012 U.S. Presidential Election.

Daily valid Ns ranged from 364 to 962, with a mean of 480 responses. Although the Gallup Daily survey is a probability survey and weights were provided to match population proportions, all results presented in the paper do not use these weights, because there is little theoretical reason to believe that Twitter users will more closely mirror the national population than the population of Gallup respondents. These weights also would not have been appropriate to use for subgroup analyses.

**Categories for demographic analysis.** Table 1 displays the categories from the Gallup data used for demographic variables.

Table A1. Categories for demographic subgroup analysis.

| <b>Demographic</b>                 | <b>Category</b>                           |
|------------------------------------|-------------------------------------------|
| <b>Gender</b>                      | Male                                      |
|                                    | Female                                    |
| <b>Age</b>                         | 18-24                                     |
|                                    | 25-34                                     |
|                                    | 35-44                                     |
|                                    | 45-54                                     |
|                                    | 55-64                                     |
|                                    | 65-74                                     |
|                                    | 75 +                                      |
| <b>Partisanship</b>                | Republican                                |
|                                    | Lean Republican                           |
|                                    | Independent, no lean                      |
|                                    | Lean Democrat                             |
|                                    | Democrat                                  |
| <b>Education</b>                   | Less than high school diploma             |
|                                    | High school degree or diploma             |
|                                    | Technical/Vocational school               |
|                                    | Some college                              |
|                                    | College graduate                          |
|                                    | Post graduate work or degree              |
| <b>Race/ethnicity (select one)</b> | White                                     |
|                                    | Other                                     |
|                                    | Black                                     |
|                                    | Asian                                     |
|                                    | Hispanic                                  |
| <b>Census region</b>               | Northeast                                 |
|                                    | Midwest                                   |
|                                    | South                                     |
|                                    | West                                      |
| <b>Employment status</b>           | Employed Full Time (Employer)             |
|                                    | Employed Full Time (Self)                 |
|                                    | Employed Part Time, Do Not Want Full Time |
|                                    | Unemployed                                |
|                                    | Employed Part Time, Want Full Time        |
| <b>Income</b>                      | Under \$720                               |
|                                    | \$720 to \$5,999                          |
|                                    | \$6,000 to \$11,999                       |

---

|                       |
|-----------------------|
| \$12,000 to \$23,999  |
| \$24,000 to \$35,999  |
| \$36,000 to \$47,999  |
| \$48,000 to \$59,999  |
| \$60,000 to \$89,999  |
| \$90,000 to \$119,999 |
| \$120,000 and over    |

---

## **Twitter Data**

Topsy was a Twitter firehose access service that was purchased by Apple and is no longer publicly available. Due to data collection failures (i.e., gaps in the Topsy data, Twitter outages, or scraping issues) we were unable to calculate sentiment for five dates during the target period: July 4, 2010, September 2, 2010, and January 16-18, 2011.



## Online Appendix B: Additional Methodological Information

### GAM Smoothing

In order to smooth the data for Twitter sentiment, overall approval, and demographic subgroup approval before all analyses, we used generalized additive models (GAMs). These models were specified in the simplest manner possible in order to produce equivalent smoothing parameters for each measure. A spline predictor was used with a linear date variable to produce an estimate of the value for each of the data streams (twitter sentiment, overall survey approval, approval for each demographic subgroup). For all analyses, we opted to use 44 degrees of freedom across the 1,960 days (the rounded square root of the number of days of data). This number was chosen because it typically produced fits that closely resembled the raw data estimates, but were not particularly sensitive to changes over the course of only a few days. It also ensured that the number of days between the average knot and the number of knots was roughly equivalent. No other predictors were included in smoothing models other than the dates.

The *gam* package in R was used to conduct these analyses. With the exception of the smoothing parameter, all values were set at their defaults. One important value of this sort of smoothing, beyond that fact that it mitigates the influence of sampling variation in the results, is that the degrees of freedom used do not necessarily place knots at the same points for each trend. This means that the method is less likely to produce spurious results based on similar inflection points. These were run with the following R code:

```
gam([measure]~s(date, k=44))
```

## **Non-Negative Least Squares Regressions**

Non-negative least squares (NNLS) regression is simply an OLS regression model for which coefficients that are less than zero are set to zero. The outcome measure for each NNLS regression was the standardized Twitter sentiment score. Standardized values of either the GAM modeled daily values or the mean value of respondents within a particular demographic category were used as predictors. For each model, all demographic variables were simultaneously included as possible predictors. Hence, the primary demographic model had 44 possible predictors on the right side of the equation and the interacted demographic model had 828 possible predictors.

This model is robust to concerns about multicollinearity because highly correlated predictors will only enter the model simultaneously if they are going in opposite directions, which was not possible given the non-negative constraint. There is some concern that the set of predictors that load into the final model could be one among many possible equivalent combinations, but this can be teased out using the bootstrapping method employed in the main body of the paper.

## **Detrended Moving Average Cross-Correlations**

Detrended Moving Average Cross-Correlations were generated based on online code posted by Ladislav Kristoufek, who first presented the method in a 2013 paper. The original code, posted on his website at [http://staff.utia.cas.cz/kristoufek/Ladislav\\_Kristoufek/Codes.html](http://staff.utia.cas.cz/kristoufek/Ladislav_Kristoufek/Codes.html) was modified to standardize the pair of variables being compared before the moving average was calculated and the results were detrended (modifications in bold).

```
require(tseries)
require(weights)
```

```
DMCA_LRCC<-function(x,y,k){
  xx<-cumsum(stdz(x[!is.na(x) & !is.na(y)]))
  yy<-cumsum(stdz(y[!is.na(x) & !is.na(y)]))
  ma<-c(rep(1,k))/k
  X_MA<-filter(xx,ma)
  Y_MA<-filter(yy,ma)
  F2_xy<-mean((xx-X_MA)[(1+floor(k/2)):(length(xx)-floor(k/2))]*(yy-
Y_MA)[(1+floor(k/2)):(length(yy)-floor(k/2))])
  F2_xx<-mean((xx-X_MA)[(1+floor(k/2)):(length(xx)-floor(k/2))]*(xx-
X_MA)[(1+floor(k/2)):(length(xx)-floor(k/2))])
  F2_yy<-mean((yy-Y_MA)[(1+floor(k/2)):(length(yy)-floor(k/2))]*(yy-
Y_MA)[(1+floor(k/2)):(length(yy)-floor(k/2))])
  rho<-F2_xy/sqrt(F2_xx*F2_yy)
  return(rho)
}
```

Some of the analyses were initially run using a more widely adopted method called detrended cross-correlation analysis (DCCA), but this method took a much longer time to run and produced results that were nearly identical.

**Online Appendix C: Correlations Between Sentiment and Approval for Individual Demographic Categories and Interacted Subgroups**

Table C1. Demographic categories from Gallup data with proportion of respondents in each category and correlations with Twitter sentiment.

| Demographic Category           | N       | Prop  | Smoothed | Daily | Smoothed DMCA | Daily DMCA |
|--------------------------------|---------|-------|----------|-------|---------------|------------|
| Male                           | 469,001 | 49.8% | .62      | .38   | .14           | .13        |
| Female                         | 472,484 | 50.2% | .71      | .44   | .20           | .16        |
| age1824                        | 62,190  | 6.6%  | .77      | .35   | .19           | .17        |
| age2534                        | 92,657  | 9.8%  | .73      | .33   | .18           | .12        |
| age3544                        | 120,803 | 12.8% | .61      | .29   | .13           | .14        |
| age4554                        | 167,388 | 17.8% | .64      | .35   | .14           | .11        |
| age5564                        | 197,077 | 20.9% | .70      | .37   | .18           | .12        |
| age6574                        | 163,833 | 17.4% | .60      | .31   | .20           | .16        |
| age75up                        | 137,537 | 14.6% | .72      | .39   | .16           | .10        |
| Republican                     | 285,140 | 30.3% | .70      | .45   | .11           | .08        |
| Lean Republican                | 136,137 | 14.5% | .23      | .15   | -.10          | -.07       |
| Independent, no lean           | 88,638  | 9.4%  | .67      | .34   | .17           | .20        |
| Lean Democrat                  | 125,015 | 13.3% | .75      | .43   | .28           | .20        |
| Democrat                       | 306,555 | 32.6% | .54      | .31   | .29           | .30        |
| Less than high school diploma  | 62,185  | 6.6%  | .80      | .40   | .32           | .27        |
| High school degree or diploma  | 168,657 | 17.9% | .63      | .35   | .07           | .07        |
| Technical/Vocational school    | 88,280  | 9.4%  | .50      | .24   | -.03          | -.01       |
| Some college                   | 217,357 | 23.1% | .58      | .32   | .22           | .23        |
| College graduate               | 203,740 | 21.6% | .58      | .32   | .12           | .11        |
| Post graduate work or degree   | 201,266 | 21.4% | .81      | .43   | .24           | .15        |
| White                          | 755,240 | 80.2% | .73      | .47   | .16           | .12        |
| Other                          | 25,753  | 2.7%  | .71      | .26   | .33           | .28        |
| Black                          | 79,009  | 8.4%  | .63      | .28   | .32           | .27        |
| Asian                          | 19,418  | 2.1%  | .50      | .14   | .03           | .04        |
| Hispanic                       | 62,065  | 6.6%  | .57      | .31   | .25           | .26        |
| Northeast                      | 174,154 | 18.5% | .61      | .33   | .15           | .11        |
| Midwest                        | 208,800 | 22.2% | .72      | .40   | .16           | .13        |
| South                          | 339,574 | 36.1% | .63      | .37   | .14           | .11        |
| West                           | 218,957 | 23.3% | .69      | .38   | .23           | .20        |
| Employed Full Time - Employer- | 463,108 | 49.2% | .63      | .38   | .11           | .09        |
| Employed Full Time -Self-      | 112,527 | 12.0% | .71      | .36   | .32           | .25        |

|                                              |         |       |     |     |      |      |
|----------------------------------------------|---------|-------|-----|-----|------|------|
| Employed Part Time, Do<br>Not Want Full Time | 164,049 | 17.4% | .67 | .37 | .22  | .20  |
| Unemployed                                   | 97,382  | 10.3% | .72 | .32 | .21  | .17  |
| Employed Part Time, Want<br>Full Time        | 104,419 | 11.1% | .70 | .33 | .10  | .01  |
| Under \$720                                  | 19,652  | 2.1%  | .59 | .13 | .04  | .04  |
| \$720 to \$5,999                             | 20,760  | 2.2%  | .60 | .13 | .12  | .05  |
| \$6,000 to \$11,999                          | 54,265  | 5.8%  | .77 | .32 | .34  | .26  |
| \$12,000 to \$23,999                         | 112,013 | 11.9% | .73 | .39 | .26  | .20  |
| \$24,000 to \$35,999                         | 121,292 | 12.9% | .65 | .34 | .07  | .04  |
| \$36,000 to \$47,999                         | 118,623 | 12.6% | .66 | .35 | .20  | .21  |
| \$48,000 to \$59,999                         | 112,601 | 12.0% | .61 | .30 | .10  | .10  |
| \$60,000 to \$89,999                         | 156,531 | 16.6% | .66 | .33 | .24  | .17  |
| \$90,000 to \$119,999                        | 84,468  | 9.0%  | .61 | .27 | -.03 | -.07 |
| \$120,000 and over                           | 141,280 | 15.0% | .63 | .30 | .15  | .11  |
| Average                                      | 171,179 | 18.2% | .65 | .33 | .17  | .14  |
| Minimum                                      | 19,418  | 2.1%  | .23 | .13 | -.10 | -.07 |
| Maximum                                      | 755,240 | 80.2% | .81 | .47 | .34  | .30  |

Table C2. Interacted two-way subgroups from Gallup data with proportion of respondents in each subgroup and correlations with Twitter sentiment.

| Interacted Subgroup                    | N       | Prop  | Smoothed | Daily | Smoothed DMCA | Daily DMCA |
|----------------------------------------|---------|-------|----------|-------|---------------|------------|
| Male x age1824                         | 34,562  | 3.7%  | .75      | .27   | .04           | .08        |
| Male x age2534                         | 50,282  | 5.3%  | .69      | .25   | .13           | .06        |
| Male x age3544                         | 65,088  | 6.9%  | .54      | .21   | .08           | .09        |
| Male x age4554                         | 86,953  | 9.2%  | .59      | .26   | .10           | .07        |
| Male x age5564                         | 98,125  | 10.4% | .65      | .28   | .22           | .16        |
| Male x age6574                         | 77,644  | 8.2%  | .57      | .24   | .20           | .17        |
| Male x age75up                         | 56,347  | 6.0%  | .66      | .29   | .06           | .05        |
| Female x age1824                       | 27,628  | 2.9%  | .78      | .27   | .31           | .23        |
| Female x age2534                       | 42,375  | 4.5%  | .76      | .28   | .20           | .14        |
| Female x age3544                       | 55,715  | 5.9%  | .65      | .26   | .16           | .12        |
| Female x age4554                       | 80,435  | 8.5%  | .68      | .32   | .16           | .12        |
| Female x age5564                       | 98,952  | 10.5% | .73      | .35   | .11           | .05        |
| Female x age6574                       | 86,189  | 9.2%  | .62      | .28   | .18           | .11        |
| Female x age75up                       | 81,190  | 8.6%  | .73      | .35   | .21           | .13        |
| Male x Republican                      | 148,297 | 15.8% | .68      | .40   | .11           | .07        |
| Male x Lean Republican                 | 79,862  | 8.5%  | .17      | .11   | -.07          | -.05       |
| Male x Independent, no lean            | 47,474  | 5.0%  | .61      | .23   | .13           | .17        |
| Male x Lean Democrat                   | 64,725  | 6.9%  | .73      | .39   | .29           | .21        |
| Male x Democrat                        | 128,643 | 13.7% | .58      | .27   | .21           | .21        |
| Female x Republican                    | 136,843 | 14.5% | .70      | .44   | .10           | .08        |
| Female x Lean Republican               | 56,275  | 6.0%  | .32      | .17   | -.12          | -.11       |
| Female x Independent, no lean          | 41,164  | 4.4%  | .70      | .32   | .19           | .17        |
| Female x Lean Democrat                 | 60,290  | 6.4%  | .75      | .39   | .26           | .19        |
| Female x Democrat                      | 177,912 | 18.9% | .50      | .25   | .32           | .31        |
| Male x Less than high school diploma   | 29,348  | 3.1%  | .82      | .34   | .38           | .30        |
| Male x High school degree or diploma   | 77,731  | 8.3%  | .64      | .29   | -.01          | -.01       |
| Male x Technical/Vocational school     | 45,500  | 4.8%  | .48      | .18   | .04           | .03        |
| Male x Some college                    | 104,294 | 11.1% | .53      | .24   | .19           | .20        |
| Male x College graduate                | 105,340 | 11.2% | .45      | .21   | .07           | .06        |
| Male x Post graduate work or degree    | 106,788 | 11.3% | .74      | .31   | .17           | .10        |
| Female x Less than high school diploma | 32,837  | 3.5%  | .76      | .31   | .22           | .15        |
| Female x High school degree            | 90,926  | 9.7%  | .59      | .31   | .12           | .13        |

or diploma

|                                                    |         |       |     |     |      |      |
|----------------------------------------------------|---------|-------|-----|-----|------|------|
| Female x Technical/Vocational school               | 42,780  | 4.5%  | .53 | .20 | -.07 | -.03 |
| Female x Some college                              | 113,063 | 12.0% | .60 | .29 | .22  | .21  |
| Female x College graduate                          | 98,400  | 10.5% | .69 | .32 | .16  | .11  |
| Female x Post graduate work or degree              | 94,478  | 10.0% | .83 | .42 | .28  | .17  |
| Male x White                                       | 376,477 | 40.0% | .71 | .43 | .15  | .12  |
| Male x Other                                       | 13,955  | 1.5%  | .53 | .17 | .20  | .20  |
| Male x Black                                       | 35,779  | 3.8%  | .58 | .20 | .15  | .12  |
| Male x Asian                                       | 11,232  | 1.2%  | .47 | .08 | -.08 | -.13 |
| Male x Hispanic                                    | 31,558  | 3.4%  | .57 | .27 | .28  | .34  |
| Female x White                                     | 378,763 | 40.2% | .75 | .47 | .16  | .11  |
| Female x Other                                     | 11,798  | 1.3%  | .81 | .21 | .43  | .27  |
| Female x Black                                     | 43,230  | 4.6%  | .64 | .22 | .41  | .32  |
| Female x Asian                                     | 8,186   | 0.9%  | .50 | .11 | .13  | .06  |
| Female x Hispanic                                  | 30,507  | 3.2%  | .56 | .24 | .15  | .11  |
| Male x Northeast                                   | 86,347  | 9.2%  | .58 | .27 | .19  | .14  |
| Male x Midwest                                     | 103,955 | 11.0% | .66 | .31 | .08  | .06  |
| Male x South                                       | 167,922 | 17.8% | .59 | .30 | .13  | .10  |
| Male x West                                        | 110,777 | 11.8% | .61 | .28 | .14  | .14  |
| Female x Northeast                                 | 87,807  | 9.3%  | .61 | .28 | .11  | .05  |
| Female x Midwest                                   | 104,845 | 11.1% | .75 | .39 | .24  | .19  |
| Female x South                                     | 171,652 | 18.2% | .65 | .35 | .15  | .10  |
| Female x West                                      | 108,180 | 11.5% | .75 | .37 | .30  | .21  |
| Male x Employed Full Time -Employer-               | 251,604 | 26.7% | .56 | .32 | .08  | .07  |
| Male x Employed Full Time -Self-                   | 61,650  | 6.5%  | .67 | .26 | .25  | .14  |
| Male x Employed Part Time, Do Not Want Full Time   | 65,403  | 6.9%  | .63 | .26 | .18  | .15  |
| Male x Unemployed                                  | 43,948  | 4.7%  | .68 | .21 | .14  | .09  |
| Male x Employed Part Time, Want Full Time          | 46,396  | 4.9%  | .67 | .21 | .08  | .01  |
| Female x Employed Full Time -Employer-             | 211,504 | 22.5% | .69 | .37 | .14  | .10  |
| Female x Employed Full Time -Self-                 | 50,877  | 5.4%  | .74 | .32 | .38  | .27  |
| Female x Employed Part Time, Do Not Want Full Time | 98,646  | 10.5% | .68 | .34 | .23  | .21  |
| Female x Unemployed                                | 53,434  | 5.7%  | .74 | .30 | .26  | .19  |
| Female x Employed Part                             | 58,023  | 6.2%  | .71 | .31 | .10  | -.01 |

Time, Want Full Time

|                                |        |      |     |     |      |      |
|--------------------------------|--------|------|-----|-----|------|------|
| Male x Under \$720             | 8,717  | 0.9% | .49 | .07 | -.01 | .03  |
| Male x \$720 to \$5,999        | 8,309  | 0.9% | .57 | .07 | .18  | .14  |
| Male x \$6,000 to \$11,999     | 20,462 | 2.2% | .76 | .23 | .33  | .21  |
| Male x \$12,000 to \$23,999    | 45,643 | 4.8% | .75 | .29 | .26  | .19  |
| Male x \$24,000 to \$35,999    | 54,493 | 5.8% | .63 | .26 | .00  | .04  |
| Male x \$36,000 to \$47,999    | 56,379 | 6.0% | .59 | .25 | .11  | .13  |
| Male x \$48,000 to \$59,999    | 56,344 | 6.0% | .53 | .19 | .03  | .03  |
| Male x \$60,000 to \$89,999    | 84,541 | 9.0% | .61 | .26 | .30  | .23  |
| Male x \$90,000 to \$119,999   | 47,951 | 5.1% | .52 | .18 | -.06 | -.10 |
| Male x \$120,000 and over      | 86,162 | 9.2% | .59 | .23 | .08  | .03  |
| Female x Under \$720           | 10,935 | 1.2% | .62 | .13 | .06  | .16  |
| Female x \$720 to \$5,999      | 12,451 | 1.3% | .56 | .07 | .03  | -.01 |
| Female x \$6,000 to \$11,999   | 33,803 | 3.6% | .75 | .26 | .31  | .22  |
| Female x \$12,000 to \$23,999  | 66,370 | 7.0% | .71 | .33 | .22  | .15  |
| Female x \$24,000 to \$35,999  | 66,799 | 7.1% | .65 | .30 | .13  | .03  |
| Female x \$36,000 to \$47,999  | 62,244 | 6.6% | .71 | .31 | .27  | .25  |
| Female x \$48,000 to \$59,999  | 56,257 | 6.0% | .66 | .29 | .14  | .13  |
| Female x \$60,000 to \$89,999  | 71,990 | 7.6% | .69 | .28 | .14  | .06  |
| Female x \$90,000 to \$119,999 | 36,517 | 3.9% | .68 | .24 | .00  | -.01 |
| Female x \$120,000 and over    | 55,118 | 5.9% | .69 | .27 | .23  | .16  |
| age1824 x Republican           | 14,366 | 1.5% | .75 | .28 | .19  | .21  |
| age1824 x Lean Republican      | 8,683  | 0.9% | .75 | .18 | .12  | .12  |
| age1824 x Independent, no lean | 6,774  | 0.7% | .69 | .11 | .13  | .05  |
| age1824 x Lean Democrat        | 11,999 | 1.3% | .72 | .18 | .24  | .17  |
| age1824 x Democrat             | 20,368 | 2.2% | .40 | .08 | -.10 | .01  |
| age2534 x Republican           | 23,133 | 2.5% | .71 | .27 | .13  | .09  |
| age2534 x Lean Republican      | 12,977 | 1.4% | .50 | .07 | -.15 | -.18 |
| age2534 x Independent, no lean | 10,807 | 1.1% | .70 | .18 | -.03 | -.04 |
| age2534 x Lean Democrat        | 15,796 | 1.7% | .76 | .27 | .27  | .25  |
| age2534 x Democrat             | 29,944 | 3.2% | .58 | .17 | .24  | .23  |
| age3544 x Republican           | 35,763 | 3.8% | .67 | .28 | .03  | -.03 |
| age3544 x Lean Republican      | 17,479 | 1.9% | .30 | .13 | -.01 | .02  |
| age3544 x Independent, no lean | 12,678 | 1.3% | .65 | .17 | .27  | .26  |
| age3544 x Lean Democrat        | 17,362 | 1.8% | .74 | .23 | .21  | .15  |
| age3544 x Democrat             | 37,521 | 4.0% | .56 | .16 | .30  | .27  |
| age4554 x Republican           | 51,922 | 5.5% | .68 | .36 | .07  | .09  |



|                                         |        |      |     |     |      |      |
|-----------------------------------------|--------|------|-----|-----|------|------|
| age4554 x Lean Republican               | 24,344 | 2.6% | .23 | .08 | -.05 | -.05 |
| age4554 x Independent, no lean          | 16,335 | 1.7% | .67 | .18 | .17  | .16  |
| age4554 x Lean Democrat                 | 21,472 | 2.3% | .76 | .27 | .25  | .12  |
| age4554 x Democrat                      | 53,315 | 5.7% | .53 | .19 | .27  | .18  |
| age5564 x Republican                    | 57,728 | 6.1% | .67 | .33 | .03  | .00  |
| age5564 x Lean Republican               | 29,602 | 3.1% | .15 | .09 | -.08 | -.04 |
| age5564 x Independent, no lean          | 17,193 | 1.8% | .62 | .17 | .23  | .19  |
| age5564 x Lean Democrat                 | 25,175 | 2.7% | .73 | .31 | .32  | .24  |
| age5564 x Democrat                      | 67,379 | 7.2% | .53 | .20 | .10  | .07  |
| age6574 x Republican                    | 53,888 | 5.7% | .67 | .35 | .18  | .11  |
| age6574 x Lean Republican               | 25,340 | 2.7% | .09 | .03 | -.11 | -.06 |
| age6574 x Independent, no lean          | 13,311 | 1.4% | .48 | .11 | -.04 | -.09 |
| age6574 x Lean Democrat                 | 18,735 | 2.0% | .67 | .28 | .25  | .18  |
| age6574 x Democrat                      | 52,559 | 5.6% | .49 | .16 | .30  | .21  |
| age75up x Republican                    | 48,340 | 5.1% | .70 | .38 | .10  | .06  |
| age75up x Lean Republican               | 17,712 | 1.9% | .24 | .13 | -.16 | -.13 |
| age75up x Independent, no lean          | 11,540 | 1.2% | .64 | .19 | .00  | .08  |
| age75up x Lean Democrat                 | 14,476 | 1.5% | .64 | .24 | .22  | .09  |
| age75up x Democrat                      | 45,469 | 4.8% | .59 | .21 | .46  | .45  |
| age1824 x Less than high school diploma | 5,958  | 0.6% | .61 | .12 | .10  | .09  |
| age1824 x High school degree or diploma | 13,876 | 1.5% | .80 | .23 | .24  | .20  |
| age1824 x Technical/Vocational school   | 5,196  | 0.6% | .63 | .13 | .07  | .07  |
| age1824 x Some college                  | 20,275 | 2.2% | .75 | .21 | .16  | .14  |
| age1824 x College graduate              | 9,915  | 1.1% | .68 | .14 | .22  | .07  |
| age1824 x Post graduate work or degree  | 6,970  | 0.7% | .64 | .07 | -.01 | .00  |
| age2534 x Less than high school diploma | 6,259  | 0.7% | .78 | .23 | .29  | .28  |
| age2534 x High school degree or diploma | 13,473 | 1.4% | .66 | .16 | .00  | .07  |
| age2534 x Technical/Vocational school   | 8,474  | 0.9% | .53 | .12 | .05  | -.03 |
| age2534 x Some college                  | 19,947 | 2.1% | .71 | .16 | .32  | .27  |
| age2534 x College graduate              | 25,236 | 2.7% | .69 | .19 | .26  | .20  |
| age2534 x Post graduate work or degree  | 19,268 | 2.0% | .71 | .18 | -.04 | -.15 |

|                                         |        |      |     |     |      |      |
|-----------------------------------------|--------|------|-----|-----|------|------|
| age3544 x Less than high school diploma | 7,050  | 0.7% | .76 | .20 | .29  | .23  |
| age3544 x High school degree or diploma | 16,286 | 1.7% | .60 | .18 | .19  | .15  |
| age3544 x Technical/Vocational school   | 11,649 | 1.2% | .34 | .08 | .02  | -.01 |
| age3544 x Some college                  | 24,551 | 2.6% | .50 | .15 | .06  | .15  |
| age3544 x College graduate              | 32,708 | 3.5% | .48 | .12 | .13  | .13  |
| age3544 x Post graduate work or degree  | 28,559 | 3.0% | .73 | .20 | .06  | .06  |
| age4554 x Less than high school diploma | 9,361  | 1.0% | .75 | .20 | .18  | .11  |
| age4554 x High school degree or diploma | 27,016 | 2.9% | .57 | .21 | -.05 | -.04 |
| age4554 x Technical/Vocational school   | 16,800 | 1.8% | .48 | .14 | -.14 | .01  |
| age4554 x Some college                  | 36,830 | 3.9% | .55 | .19 | .27  | .24  |
| age4554 x College graduate              | 41,358 | 4.4% | .53 | .19 | -.05 | -.03 |
| age4554 x Post graduate work or degree  | 36,023 | 3.8% | .82 | .28 | .33  | .26  |
| age5564 x Less than high school diploma | 9,993  | 1.1% | .74 | .20 | .15  | .20  |
| age5564 x High school degree or diploma | 31,165 | 3.3% | .56 | .23 | .23  | .19  |
| age5564 x Technical/Vocational school   | 18,503 | 2.0% | .50 | .12 | .07  | .05  |
| age5564 x Some college                  | 46,529 | 4.9% | .59 | .22 | .12  | .09  |
| age5564 x College graduate              | 43,075 | 4.6% | .65 | .19 | .10  | -.02 |
| age5564 x Post graduate work or degree  | 47,812 | 5.1% | .80 | .29 | .20  | .08  |
| age6574 x Less than high school diploma | 10,964 | 1.2% | .79 | .17 | .31  | .16  |
| age6574 x High school degree or diploma | 33,104 | 3.5% | .56 | .20 | -.01 | .02  |
| age6574 x Technical/Vocational school   | 15,032 | 1.6% | .41 | .06 | -.03 | -.13 |
| age6574 x Some college                  | 38,697 | 4.1% | .34 | .12 | .10  | .09  |
| age6574 x College graduate              | 28,822 | 3.1% | .39 | .11 | .06  | .04  |
| age6574 x Post graduate work or degree  | 37,214 | 4.0% | .81 | .26 | .33  | .25  |
| age75up x Less than high school diploma | 12,600 | 1.3% | .81 | .22 | .29  | .09  |
| age75up x High school degree or diploma | 33,737 | 3.6% | .70 | .25 | .01  | -.04 |
| age75up x                               | 12,626 | 1.3% | .64 | .14 | .02  | .00  |

Technical/Vocational school

|                                        |         |       |     |     |      |      |
|----------------------------------------|---------|-------|-----|-----|------|------|
| age75up x Some college                 | 30,528  | 3.2%  | .56 | .18 | .05  | .10  |
| age75up x College graduate             | 22,626  | 2.4%  | .61 | .20 | .08  | .05  |
| age75up x Post graduate work or degree | 25,420  | 2.7%  | .82 | .26 | .38  | .24  |
| age1824 x White                        | 35,953  | 3.8%  | .79 | .36 | .11  | .13  |
| age1824 x Other                        | 2,977   | 0.3%  | .69 | .10 | .35  | .19  |
| age1824 x Black                        | 9,176   | 1.0%  | .59 | .12 | .16  | .10  |
| age1824 x Asian                        | 3,492   | 0.4%  | .58 | .10 | .14  | .09  |
| age1824 x Hispanic                     | 10,592  | 1.1%  | .59 | .15 | .14  | .20  |
| age2534 x White                        | 61,945  | 6.6%  | .75 | .33 | .13  | .08  |
| age2534 x Other                        | 3,640   | 0.4%  | .77 | .17 | .24  | .19  |
| age2534 x Black                        | 11,068  | 1.2%  | .63 | .13 | .08  | -.01 |
| age2534 x Asian                        | 3,984   | 0.4%  | .51 | .07 | .07  | .04  |
| age2534 x Hispanic                     | 12,020  | 1.3%  | .65 | .19 | .33  | .28  |
| age3544 x White                        | 88,789  | 9.4%  | .68 | .33 | .08  | .10  |
| age3544 x Other                        | 4,139   | 0.4%  | .68 | .12 | .20  | .09  |
| age3544 x Black                        | 12,329  | 1.3%  | .69 | .11 | .40  | .32  |
| age3544 x Asian                        | 3,752   | 0.4%  | .37 | .04 | -.20 | -.09 |
| age3544 x Hispanic                     | 11,794  | 1.3%  | .49 | .15 | .14  | .15  |
| age4554 x White                        | 133,362 | 14.2% | .71 | .39 | .14  | .10  |
| age4554 x Other                        | 5,095   | 0.5%  | .53 | .09 | .04  | .05  |
| age4554 x Black                        | 15,229  | 1.6%  | .57 | .15 | .13  | .03  |
| age4554 x Asian                        | 3,106   | 0.3%  | .42 | .06 | -.10 | -.08 |
| age4554 x Hispanic                     | 10,596  | 1.1%  | .48 | .12 | .11  | .09  |
| age5564 x White                        | 166,658 | 17.7% | .75 | .40 | .17  | .09  |
| age5564 x Other                        | 4,813   | 0.5%  | .62 | .13 | .27  | .14  |
| age5564 x Black                        | 14,770  | 1.6%  | .54 | .13 | .19  | .00  |
| age5564 x Asian                        | 2,505   | 0.3%  | .49 | .05 | .18  | .20  |
| age5564 x Hispanic                     | 8,331   | 0.9%  | .48 | .11 | .17  | .21  |
| age6574 x White                        | 143,790 | 15.3% | .66 | .34 | .17  | .12  |
| age6574 x Other                        | 3,066   | 0.3%  | .59 | .11 | .37  | .25  |
| age6574 x Black                        | 9,979   | 1.1%  | .43 | .08 | .29  | .13  |
| age6574 x Asian                        | 1,562   | 0.2%  | .33 | .05 | -.02 | -.08 |
| age6574 x Hispanic                     | 5,436   | 0.6%  | .60 | .10 | .23  | .13  |
| age75up x White                        | 124,743 | 13.2% | .74 | .41 | .15  | .09  |
| age75up x Other                        | 2,023   | 0.2%  | .57 | .13 | .22  | .16  |
| age75up x Black                        | 6,458   | 0.7%  | .37 | .05 | .27  | .15  |
| age75up x Asian                        | 1,017   | 0.1%  | .19 | .02 | .05  | -.05 |
| age75up x Hispanic                     | 3,296   | 0.4%  | .54 | .06 | .05  | -.04 |

|                                                     |        |      |     |     |      |      |
|-----------------------------------------------------|--------|------|-----|-----|------|------|
| age1824 x Northeast                                 | 10,984 | 1.2% | .65 | .13 | .09  | .09  |
| age1824 x Midwest                                   | 13,355 | 1.4% | .78 | .20 | .17  | .15  |
| age1824 x South                                     | 22,632 | 2.4% | .76 | .27 | .13  | .13  |
| age1824 x West                                      | 15,219 | 1.6% | .73 | .19 | .16  | .13  |
| age2534 x Northeast                                 | 16,268 | 1.7% | .67 | .15 | .08  | .01  |
| age2534 x Midwest                                   | 19,577 | 2.1% | .78 | .20 | .36  | .28  |
| age2534 x South                                     | 34,181 | 3.6% | .71 | .24 | .03  | .01  |
| age2534 x West                                      | 22,631 | 2.4% | .70 | .18 | .18  | .17  |
| age3544 x Northeast                                 | 22,202 | 2.4% | .48 | .13 | .04  | .08  |
| age3544 x Midwest                                   | 26,649 | 2.8% | .65 | .19 | .11  | .13  |
| age3544 x South                                     | 43,575 | 4.6% | .53 | .18 | .22  | .19  |
| age3544 x West                                      | 28,377 | 3.0% | .64 | .17 | -.03 | -.05 |
| age4554 x Northeast                                 | 32,352 | 3.4% | .58 | .21 | .03  | .01  |
| age4554 x Midwest                                   | 38,042 | 4.0% | .64 | .23 | -.01 | .00  |
| age4554 x South                                     | 59,533 | 6.3% | .60 | .24 | .09  | .09  |
| age4554 x West                                      | 37,461 | 4.0% | .67 | .23 | .35  | .24  |
| age5564 x Northeast                                 | 36,952 | 3.9% | .63 | .23 | .19  | .15  |
| age5564 x Midwest                                   | 44,373 | 4.7% | .74 | .29 | .22  | .16  |
| age5564 x South                                     | 70,149 | 7.5% | .62 | .24 | .16  | .11  |
| age5564 x West                                      | 45,603 | 4.8% | .72 | .23 | .07  | -.01 |
| age6574 x Northeast                                 | 29,284 | 3.1% | .55 | .14 | .13  | .03  |
| age6574 x Midwest                                   | 35,483 | 3.8% | .65 | .23 | .05  | -.02 |
| age6574 x South                                     | 61,125 | 6.5% | .53 | .20 | .16  | .08  |
| age6574 x West                                      | 37,941 | 4.0% | .62 | .19 | .38  | .34  |
| age75up x Northeast                                 | 26,112 | 2.8% | .67 | .23 | .24  | .13  |
| age75up x Midwest                                   | 31,321 | 3.3% | .72 | .28 | .14  | .10  |
| age75up x South                                     | 48,379 | 5.1% | .71 | .27 | .08  | -.01 |
| age75up x West                                      | 31,725 | 3.4% | .67 | .24 | .14  | .16  |
| age1824 x Employed Full Time -Employer-             | 32,377 | 3.4% | .73 | .26 | .05  | .08  |
| age1824 x Employed Full Time -Self-                 | 3,894  | 0.4% | .76 | .13 | .07  | .14  |
| age1824 x Employed Part Time, Do Not Want Full Time | 6,668  | 0.7% | .72 | .14 | .30  | .30  |
| age1824 x Unemployed                                | 8,700  | 0.9% | .76 | .16 | .28  | .15  |
| age1824 x Employed Part Time, Want Full Time        | 10,551 | 1.1% | .71 | .15 | .10  | .07  |
| age2534 x Employed Full Time -Employer-             | 59,251 | 6.3% | .73 | .27 | .29  | .26  |
| age2534 x Employed Full Time -Self-                 | 7,087  | 0.8% | .59 | .07 | .09  | .05  |

|                                                     |         |       |     |     |      |      |
|-----------------------------------------------------|---------|-------|-----|-----|------|------|
| age2534 x Employed Part Time, Do Not Want Full Time | 7,296   | 0.8%  | .60 | .12 | -.12 | -.03 |
| age2534 x Unemployed                                | 9,290   | 1.0%  | .72 | .12 | .10  | -.06 |
| age2534 x Employed Part Time, Want Full Time        | 9,733   | 1.0%  | .66 | .10 | -.22 | -.28 |
| age3544 x Employed Full Time -Employer-             | 76,403  | 8.1%  | .54 | .23 | -.03 | .01  |
| age3544 x Employed Full Time -Self-                 | 11,028  | 1.2%  | .65 | .15 | .24  | .16  |
| age3544 x Employed Part Time, Do Not Want Full Time | 11,264  | 1.2%  | .59 | .08 | .27  | .13  |
| age3544 x Unemployed                                | 10,756  | 1.1%  | .60 | .11 | .23  | .27  |
| age3544 x Employed Part Time, Want Full Time        | 11,352  | 1.2%  | .58 | .10 | .14  | .08  |
| age4554 x Employed Full Time -Employer-             | 100,310 | 10.7% | .60 | .29 | .08  | .07  |
| age4554 x Employed Full Time -Self-                 | 17,669  | 1.9%  | .66 | .16 | .30  | .16  |
| age4554 x Employed Part Time, Do Not Want Full Time | 17,933  | 1.9%  | .56 | .13 | -.04 | .01  |
| age4554 x Unemployed                                | 15,403  | 1.6%  | .70 | .16 | .25  | .21  |
| age4554 x Employed Part Time, Want Full Time        | 16,073  | 1.7%  | .72 | .17 | .12  | .06  |
| age5564 x Employed Full Time -Employer-             | 99,449  | 10.6% | .65 | .28 | .09  | .01  |
| age5564 x Employed Full Time -Self-                 | 24,631  | 2.6%  | .72 | .22 | .29  | .20  |
| age5564 x Employed Part Time, Do Not Want Full Time | 33,235  | 3.5%  | .69 | .21 | .20  | .16  |
| age5564 x Unemployed                                | 19,458  | 2.1%  | .72 | .16 | .13  | .08  |
| age5564 x Employed Part Time, Want Full Time        | 20,304  | 2.2%  | .72 | .19 | .13  | .09  |
| age6574 x Employed Full Time -Employer-             | 56,050  | 6.0%  | .53 | .18 | .03  | -.02 |
| age6574 x Employed Full Time -Self-                 | 25,187  | 2.7%  | .58 | .15 | .27  | .18  |
| age6574 x Employed Part Time, Do Not Want Full Time | 44,911  | 4.8%  | .62 | .22 | .31  | .29  |
| age6574 x Unemployed                                | 18,117  | 1.9%  | .60 | .15 | .13  | .14  |
| age6574 x Employed Part Time, Want Full Time        | 19,568  | 2.1%  | .63 | .15 | .12  | .05  |

|                                                     |        |      |     |     |      |      |
|-----------------------------------------------------|--------|------|-----|-----|------|------|
| age75up x Employed Full Time -Employer-             | 39,268 | 4.2% | .73 | .27 | .38  | .33  |
| age75up x Employed Full Time -Self-                 | 23,031 | 2.4% | .75 | .24 | .14  | .06  |
| age75up x Employed Part Time, Do Not Want Full Time | 42,742 | 4.5% | .66 | .27 | .05  | .00  |
| age75up x Unemployed                                | 15,658 | 1.7% | .64 | .13 | -.09 | -.23 |
| age75up x Employed Part Time, Want Full Time        | 16,838 | 1.8% | .70 | .20 | .09  | -.01 |
| age1824 x Under \$720                               | 2,672  | 0.3% | .62 | .06 | .22  | .19  |
| age1824 x \$720 to \$5,999                          | 2,797  | 0.3% | .49 | .04 | -.06 | -.01 |
| age1824 x \$6,000 to \$11,999                       | 5,434  | 0.6% | .64 | .11 | .14  | .08  |
| age1824 x \$12,000 to \$23,999                      | 9,554  | 1.0% | .76 | .19 | .14  | -.02 |
| age1824 x \$24,000 to \$35,999                      | 8,704  | 0.9% | .70 | .12 | .03  | .00  |
| age1824 x \$36,000 to \$47,999                      | 7,523  | 0.8% | .77 | .15 | .24  | .15  |
| age1824 x \$48,000 to \$59,999                      | 6,460  | 0.7% | .65 | .14 | .17  | .13  |
| age1824 x \$60,000 to \$89,999                      | 7,497  | 0.8% | .69 | .15 | .13  | .16  |
| age1824 x \$90,000 to \$119,999                     | 4,326  | 0.5% | .61 | .10 | -.04 | -.05 |
| age1824 x \$120,000 and over                        | 7,223  | 0.8% | .68 | .12 | -.04 | .04  |
| age2534 x Under \$720                               | 2,110  | 0.2% | .56 | .07 | .05  | -.16 |
| age2534 x \$720 to \$5,999                          | 2,070  | 0.2% | .48 | .05 | .06  | .05  |
| age2534 x \$6,000 to \$11,999                       | 4,902  | 0.5% | .80 | .11 | .29  | .19  |
| age2534 x \$12,000 to \$23,999                      | 11,277 | 1.2% | .78 | .17 | .30  | .13  |
| age2534 x \$24,000 to \$35,999                      | 12,493 | 1.3% | .69 | .17 | -.19 | -.18 |
| age2534 x \$36,000 to \$47,999                      | 11,987 | 1.3% | .65 | .11 | -.05 | -.03 |
| age2534 x \$48,000 to \$59,999                      | 11,404 | 1.2% | .68 | .14 | .24  | .21  |
| age2534 x \$60,000 to \$89,999                      | 16,671 | 1.8% | .70 | .18 | .40  | .36  |
| age2534 x \$90,000 to \$119,999                     | 8,036  | 0.9% | .51 | .06 | -.14 | -.06 |
| age2534 x \$120,000 and over                        | 11,707 | 1.2% | .53 | .08 | -.07 | -.19 |
| age3544 x Under \$720                               | 2,224  | 0.2% | .36 | .05 | -.23 | -.14 |

|                                 |        |      |     |     |      |      |
|---------------------------------|--------|------|-----|-----|------|------|
| age3544 x \$720 to \$5,999      | 2,301  | 0.2% | .43 | .04 | .06  | -.06 |
| age3544 x \$6,000 to \$11,999   | 5,225  | 0.6% | .72 | .13 | .36  | .16  |
| age3544 x \$12,000 to \$23,999  | 11,087 | 1.2% | .75 | .19 | .39  | .21  |
| age3544 x \$24,000 to \$35,999  | 12,775 | 1.4% | .66 | .18 | .12  | .13  |
| age3544 x \$36,000 to \$47,999  | 13,649 | 1.4% | .58 | .11 | .19  | .08  |
| age3544 x \$48,000 to \$59,999  | 14,150 | 1.5% | .53 | .13 | .04  | .09  |
| age3544 x \$60,000 to \$89,999  | 23,027 | 2.4% | .50 | .12 | .03  | .03  |
| age3544 x \$90,000 to \$119,999 | 13,559 | 1.4% | .47 | .10 | -.20 | -.06 |
| age3544 x \$120,000 and over    | 22,806 | 2.4% | .57 | .11 | .15  | .17  |
| age4554 x Under \$720           | 3,585  | 0.4% | .45 | .08 | .26  | .19  |
| age4554 x \$720 to \$5,999      | 3,162  | 0.3% | .50 | .04 | .01  | -.05 |
| age4554 x \$6,000 to \$11,999   | 8,526  | 0.9% | .75 | .18 | .20  | .10  |
| age4554 x \$12,000 to \$23,999  | 15,981 | 1.7% | .69 | .21 | .08  | .03  |
| age4554 x \$24,000 to \$35,999  | 18,073 | 1.9% | .63 | .14 | .07  | -.03 |
| age4554 x \$36,000 to \$47,999  | 18,421 | 2.0% | .63 | .17 | .18  | .06  |
| age4554 x \$48,000 to \$59,999  | 19,664 | 2.1% | .57 | .15 | .01  | .01  |
| age4554 x \$60,000 to \$89,999  | 30,472 | 3.2% | .60 | .20 | .19  | .16  |
| age4554 x \$90,000 to \$119,999 | 17,514 | 1.9% | .54 | .14 | .00  | -.05 |
| age4554 x \$120,000 and over    | 31,990 | 3.4% | .64 | .20 | .13  | .11  |
| age5564 x Under \$720           | 3,643  | 0.4% | .38 | .03 | -.19 | -.12 |
| age5564 x \$720 to \$5,999      | 3,411  | 0.4% | .60 | .09 | .31  | .28  |
| age5564 x \$6,000 to \$11,999   | 10,619 | 1.1% | .72 | .14 | .27  | .16  |
| age5564 x \$12,000 to \$23,999  | 20,104 | 2.1% | .71 | .23 | .28  | .28  |
| age5564 x \$24,000 to \$35,999  | 23,232 | 2.5% | .68 | .21 | .13  | .02  |
| age5564 x \$36,000 to \$47,999  | 24,210 | 2.6% | .64 | .21 | .03  | .02  |
| age5564 x \$48,000 to \$59,999  | 23,872 | 2.5% | .65 | .17 | -.03 | -.08 |
| age5564 x \$60,000 to           | 36,019 | 3.8% | .69 | .19 | .21  | .06  |

|                                            |        |      |     |     |      |      |
|--------------------------------------------|--------|------|-----|-----|------|------|
| \$89,999                                   |        |      |     |     |      |      |
| age5564 x \$90,000 to \$119,999            | 19,018 | 2.0% | .70 | .15 | .19  | .06  |
| age5564 x \$120,000 and over               | 32,949 | 3.5% | .61 | .18 | .12  | .05  |
| age6574 x Under \$720                      | 2,432  | 0.3% | .21 | .00 | -.12 | -.15 |
| age6574 x \$720 to \$5,999                 | 3,178  | 0.3% | .30 | .04 | -.04 | .03  |
| age6574 x \$6,000 to \$11,999              | 9,687  | 1.0% | .70 | .16 | .36  | .25  |
| age6574 x \$12,000 to \$23,999             | 20,580 | 2.2% | .66 | .17 | .10  | .01  |
| age6574 x \$24,000 to \$35,999             | 23,777 | 2.5% | .50 | .15 | .05  | .03  |
| age6574 x \$36,000 to \$47,999             | 23,352 | 2.5% | .55 | .18 | .18  | .19  |
| age6574 x \$48,000 to \$59,999             | 20,961 | 2.2% | .55 | .16 | .26  | .20  |
| age6574 x \$60,000 to \$89,999             | 26,375 | 2.8% | .59 | .11 | .16  | .11  |
| age6574 x \$90,000 to \$119,999            | 12,847 | 1.4% | .37 | .08 | -.03 | -.07 |
| age6574 x \$120,000 and over               | 20,644 | 2.2% | .60 | .11 | .24  | .03  |
| age75up x Under \$720                      | 2,986  | 0.3% | .61 | .09 | -.03 | .07  |
| age75up x \$720 to \$5,999                 | 3,841  | 0.4% | .50 | .02 | -.09 | -.09 |
| age75up x \$6,000 to \$11,999              | 9,872  | 1.0% | .75 | .11 | .06  | -.11 |
| age75up x \$12,000 to \$23,999             | 23,430 | 2.5% | .73 | .25 | .19  | .12  |
| age75up x \$24,000 to \$35,999             | 22,238 | 2.4% | .70 | .22 | .03  | .04  |
| age75up x \$36,000 to \$47,999             | 19,481 | 2.1% | .71 | .20 | .21  | .15  |
| age75up x \$48,000 to \$59,999             | 16,090 | 1.7% | .54 | .14 | -.02 | .03  |
| age75up x \$60,000 to \$89,999             | 16,470 | 1.7% | .65 | .19 | .15  | .10  |
| age75up x \$90,000 to \$119,999            | 9,168  | 1.0% | .63 | .14 | .09  | -.03 |
| age75up x \$120,000 and over               | 13,961 | 1.5% | .70 | .15 | .24  | .08  |
| Republican x Less than high school diploma | 14,227 | 1.5% | .84 | .30 | .38  | .27  |
| Republican x High school degree or diploma | 51,092 | 5.4% | .76 | .39 | .20  | .13  |
| Republican x Technical/Vocational school   | 26,203 | 2.8% | .65 | .26 | -.05 | -.08 |



|                                                      |        |      |     |     |      |      |
|------------------------------------------------------|--------|------|-----|-----|------|------|
| Republican x Some college                            | 69,892 | 7.4% | .67 | .34 | .18  | .14  |
| Republican x College graduate                        | 68,401 | 7.3% | .65 | .36 | -.04 | -.02 |
| Republican x Post graduate work or degree            | 55,325 | 5.9% | .63 | .32 | -.02 | -.01 |
| Lean Republican x Less than high school diploma      | 8,085  | 0.9% | .76 | .19 | .15  | .04  |
| Lean Republican x High school degree or diploma      | 22,991 | 2.4% | .47 | .16 | -.09 | -.06 |
| Lean Republican x Technical/Vocational school        | 13,615 | 1.4% | .19 | .08 | -.09 | -.08 |
| Lean Republican x Some college                       | 33,093 | 3.5% | .16 | .07 | -.16 | -.10 |
| Lean Republican x College graduate                   | 30,725 | 3.3% | .11 | .04 | -.07 | -.02 |
| Lean Republican x Post graduate work or degree       | 27,628 | 2.9% | .06 | .05 | -.10 | -.06 |
| Independent, no lean x Less than high school diploma | 8,428  | 0.9% | .69 | .18 | .19  | .21  |
| Independent, no lean x High school degree or diploma | 17,548 | 1.9% | .63 | .19 | .18  | .11  |
| Independent, no lean x Technical/Vocational school   | 10,271 | 1.1% | .66 | .13 | .28  | .25  |
| Independent, no lean x Some college                  | 19,534 | 2.1% | .61 | .14 | .13  | .11  |
| Independent, no lean x College graduate              | 16,332 | 1.7% | .69 | .19 | .18  | .14  |
| Independent, no lean x Post graduate work or degree  | 16,525 | 1.8% | .58 | .13 | -.04 | -.06 |
| Lean Democrat x Less than high school diploma        | 8,933  | 0.9% | .69 | .21 | .28  | .27  |
| Lean Democrat x High school degree or diploma        | 20,490 | 2.2% | .76 | .30 | .34  | .27  |
| Lean Democrat x Technical/Vocational school          | 11,530 | 1.2% | .70 | .16 | .14  | .02  |
| Lean Democrat x Some college                         | 28,120 | 3.0% | .74 | .31 | .32  | .21  |
| Lean Democrat x College graduate                     | 26,851 | 2.9% | .69 | .32 | .22  | .14  |
| Lean Democrat x Post graduate work or degree         | 29,091 | 3.1% | .68 | .31 | .21  | .10  |
| Democrat x Less than high school diploma             | 22,512 | 2.4% | .24 | .10 | .13  | .23  |
| Democrat x High school degree or diploma             | 56,536 | 6.0% | .19 | .09 | .02  | .10  |
| Democrat x                                           | 26,661 | 2.8% | .30 | .08 | .01  | .02  |

|                                         |         |       |     |      |      |      |
|-----------------------------------------|---------|-------|-----|------|------|------|
| Technical/Vocational school             |         |       |     |      |      |      |
| Democrat x Some college                 | 66,718  | 7.1%  | .54 | .22  | .31  | .27  |
| Democrat x College graduate             | 61,431  | 6.5%  | .73 | .25  | .36  | .32  |
| Democrat x Post graduate work or degree | 72,697  | 7.7%  | .80 | .29  | .36  | .28  |
| Republican x White                      | 261,546 | 27.8% | .70 | .45  | .10  | .09  |
| Republican x Other                      | 5,261   | 0.6%  | .62 | .16  | .16  | .05  |
| Republican x Black                      | 4,624   | 0.5%  | .69 | .12  | .23  | .12  |
| Republican x Asian                      | 3,375   | 0.4%  | .54 | .07  | -.26 | -.25 |
| Republican x Hispanic                   | 10,334  | 1.1%  | .72 | .17  | .19  | .07  |
| Lean Republican x White                 | 118,597 | 12.6% | .32 | .20  | -.10 | -.07 |
| Lean Republican x Other                 | 3,694   | 0.4%  | .17 | .03  | .14  | .08  |
| Lean Republican x Black                 | 3,905   | 0.4%  | .24 | .05  | .17  | .16  |
| Lean Republican x Asian                 | 2,384   | 0.3%  | .13 | -.01 | -.32 | -.37 |
| Lean Republican x Hispanic              | 7,557   | 0.8%  | .61 | .12  | .11  | .05  |
| Independent, no lean x White            | 68,411  | 7.3%  | .70 | .36  | .10  | .14  |
| Independent, no lean x Other            | 3,635   | 0.4%  | .63 | .08  | .06  | .21  |
| Independent, no lean x Black            | 6,384   | 0.7%  | .43 | .06  | .04  | -.05 |
| Independent, no lean x Asian            | 2,327   | 0.2%  | .39 | .05  | .06  | .12  |
| Independent, no lean x Hispanic         | 7,881   | 0.8%  | .57 | .17  | .44  | .36  |
| Lean Democrat x White                   | 93,974  | 10.0% | .71 | .41  | .24  | .16  |
| Lean Democrat x Other                   | 4,178   | 0.4%  | .75 | .19  | .23  | .19  |
| Lean Democrat x Black                   | 11,824  | 1.3%  | .69 | .09  | .33  | .13  |
| Lean Democrat x Asian                   | 3,847   | 0.4%  | .66 | .09  | .15  | .07  |
| Lean Democrat x Hispanic                | 11,192  | 1.2%  | .63 | .18  | .26  | .20  |
| Democrat x White                        | 212,712 | 22.6% | .64 | .33  | .29  | .27  |
| Democrat x Other                        | 8,985   | 1.0%  | .62 | .11  | .33  | .28  |
| Democrat x Black                        | 52,272  | 5.6%  | .34 | .13  | .15  | .16  |
| Democrat x Asian                        | 7,485   | 0.8%  | .24 | .04  | .13  | .05  |
| Democrat x Hispanic                     | 25,101  | 2.7%  | .40 | .16  | .16  | .20  |
| Republican x Northeast                  | 44,254  | 4.7%  | .72 | .37  | .12  | .10  |
| Republican x Midwest                    | 62,802  | 6.7%  | .69 | .37  | .06  | .07  |
| Republican x South                      | 113,609 | 12.1% | .68 | .40  | .11  | .08  |
| Republican x West                       | 64,475  | 6.8%  | .68 | .33  | .11  | .03  |
| Lean Republican x Northeast             | 23,267  | 2.5%  | .16 | .08  | -.11 | -.07 |
| Lean Republican x Midwest               | 30,802  | 3.3%  | .35 | .13  | -.03 | -.01 |
| Lean Republican x South                 | 51,360  | 5.5%  | .21 | .11  | -.11 | -.06 |
| Lean Republican x West                  | 30,708  | 3.3%  | .19 | .11  | -.12 | -.06 |
| Independent, no lean x Northeast        | 16,570  | 1.8%  | .56 | .16  | .07  | .08  |

|                                                                  |         |       |     |     |      |      |
|------------------------------------------------------------------|---------|-------|-----|-----|------|------|
| Independent, no lean x Midwest                                   | 20,086  | 2.1%  | .65 | .20 | .06  | .01  |
| Independent, no lean x South                                     | 31,282  | 3.3%  | .68 | .24 | .20  | .16  |
| Independent, no lean x West                                      | 20,700  | 2.2%  | .64 | .19 | .20  | .18  |
| Lean Democrat x Northeast                                        | 26,182  | 2.8%  | .75 | .28 | .29  | .18  |
| Lean Democrat x Midwest                                          | 28,888  | 3.1%  | .75 | .34 | .30  | .21  |
| Lean Democrat x South                                            | 39,122  | 4.2%  | .72 | .34 | .27  | .22  |
| Lean Democrat x West                                             | 30,823  | 3.3%  | .75 | .31 | .21  | .11  |
| Democrat x Northeast                                             | 63,881  | 6.8%  | .39 | .16 | .23  | .19  |
| Democrat x Midwest                                               | 66,222  | 7.0%  | .61 | .24 | .25  | .24  |
| Democrat x South                                                 | 104,201 | 11.1% | .45 | .20 | .26  | .25  |
| Democrat x West                                                  | 72,251  | 7.7%  | .67 | .27 | .33  | .31  |
| Republican x Employed Full Time -Employer-                       | 139,802 | 14.8% | .68 | .42 | .06  | .06  |
| Republican x Employed Full Time -Self-                           | 37,294  | 4.0%  | .68 | .30 | .05  | -.03 |
| Republican x Employed Part Time, Do Not Want Full Time           | 52,338  | 5.6%  | .68 | .34 | .15  | .11  |
| Republican x Unemployed                                          | 26,493  | 2.8%  | .74 | .29 | .11  | .03  |
| Republican x Employed Part Time, Want Full Time                  | 29,213  | 3.1%  | .75 | .33 | .21  | .14  |
| Lean Republican x Employed Full Time -Employer-                  | 68,569  | 7.3%  | .16 | .08 | -.16 | -.11 |
| Lean Republican x Employed Full Time -Self-                      | 17,453  | 1.9%  | .23 | .11 | .05  | .06  |
| Lean Republican x Employed Part Time, Do Not Want Full Time      | 22,540  | 2.4%  | .28 | .14 | -.02 | .07  |
| Lean Republican x Unemployed                                     | 13,304  | 1.4%  | .35 | .07 | .01  | -.07 |
| Lean Republican x Employed Part Time, Want Full Time             | 14,271  | 1.5%  | .28 | .10 | -.12 | -.14 |
| Independent, no lean x Employed Full Time -Employer-             | 43,994  | 4.7%  | .63 | .25 | .08  | .12  |
| Independent, no lean x Employed Full Time -Self-                 | 10,574  | 1.1%  | .69 | .16 | .21  | .15  |
| Independent, no lean x Employed Part Time, Do Not Want Full Time | 13,920  | 1.5%  | .68 | .20 | .22  | .23  |
| Independent, no lean x Unemployed                                | 9,739   | 1.0%  | .71 | .16 | .33  | .30  |

|                                                                 |         |       |     |     |      |      |
|-----------------------------------------------------------------|---------|-------|-----|-----|------|------|
| Independent, no lean x<br>Employed Part Time, Want<br>Full Time | 10,411  | 1.1%  | .56 | .12 | -.01 | .04  |
| Lean Democrat x Employed<br>Full Time -Employer-                | 62,943  | 6.7%  | .73 | .37 | .25  | .15  |
| Lean Democrat x Employed<br>Full Time -Self-                    | 13,839  | 1.5%  | .74 | .25 | .35  | .26  |
| Lean Democrat x Employed<br>Part Time, Do Not Want Full<br>Time | 20,263  | 2.2%  | .71 | .27 | .29  | .22  |
| Lean Democrat x<br>Unemployed                                   | 13,417  | 1.4%  | .78 | .28 | .30  | .26  |
| Lean Democrat x Employed<br>Part Time, Want Full Time           | 14,553  | 1.5%  | .77 | .27 | .20  | .16  |
| Democrat x Employed Full<br>Time -Employer-                     | 147,800 | 15.7% | .54 | .25 | .27  | .28  |
| Democrat x Employed Full<br>Time -Self-                         | 33,367  | 3.5%  | .60 | .19 | .43  | .34  |
| Democrat x Employed Part<br>Time, Do Not Want Full<br>Time      | 54,988  | 5.8%  | .58 | .21 | .39  | .33  |
| Democrat x Unemployed                                           | 34,429  | 3.7%  | .46 | .14 | .03  | .05  |
| Democrat x Employed Part<br>Time, Want Full Time                | 35,971  | 3.8%  | .47 | .15 | .06  | .08  |
| Republican x Under \$720                                        | 4,266   | 0.5%  | .70 | .16 | .22  | .17  |
| Republican x \$720 to \$5,999                                   | 4,834   | 0.5%  | .59 | .11 | .11  | .17  |
| Republican x \$6,000 to<br>\$11,999                             | 11,868  | 1.3%  | .73 | .20 | .21  | .16  |
| Republican x \$12,000 to<br>\$23,999                            | 28,056  | 3.0%  | .76 | .33 | .17  | .12  |
| Republican x \$24,000 to<br>\$35,999                            | 34,582  | 3.7%  | .70 | .34 | .04  | .00  |
| Republican x \$36,000 to<br>\$47,999                            | 36,052  | 3.8%  | .71 | .32 | .09  | .08  |
| Republican x \$48,000 to<br>\$59,999                            | 35,776  | 3.8%  | .67 | .29 | .14  | .09  |
| Republican x \$60,000 to<br>\$89,999                            | 52,099  | 5.5%  | .66 | .32 | .10  | .06  |
| Republican x \$90,000 to<br>\$119,999                           | 28,301  | 3.0%  | .66 | .29 | -.02 | -.04 |
| Republican x \$120,000 and<br>over                              | 49,306  | 5.2%  | .63 | .31 | .06  | .05  |
| Lean Republican x Under<br>\$720                                | 2,515   | 0.3%  | .49 | .05 | .06  | .07  |
| Lean Republican x \$720 to<br>\$5,999                           | 2,690   | 0.3%  | .40 | .04 | -.07 | .00  |

|                                              |        |      |     |     |      |      |
|----------------------------------------------|--------|------|-----|-----|------|------|
| Lean Republican x \$6,000 to \$11,999        | 6,451  | 0.7% | .61 | .09 | .04  | .00  |
| Lean Republican x \$12,000 to \$23,999       | 14,574 | 1.5% | .41 | .13 | -.17 | -.15 |
| Lean Republican x \$24,000 to \$35,999       | 16,994 | 1.8% | .27 | .06 | -.01 | .04  |
| Lean Republican x \$36,000 to \$47,999       | 17,368 | 1.8% | .16 | .10 | -.24 | -.11 |
| Lean Republican x \$48,000 to \$59,999       | 16,750 | 1.8% | .15 | .07 | -.12 | -.08 |
| Lean Republican x \$60,000 to \$89,999       | 23,775 | 2.5% | .14 | .07 | -.08 | -.03 |
| Lean Republican x \$90,000 to \$119,999      | 13,054 | 1.4% | .14 | .05 | -.08 | -.06 |
| Lean Republican x \$120,000 and over         | 21,966 | 2.3% | .17 | .06 | -.06 | .00  |
| Independent, no lean x Under \$720           | 2,647  | 0.3% | .47 | .03 | .07  | .04  |
| Independent, no lean x \$720 to \$5,999      | 2,717  | 0.3% | .42 | .03 | -.09 | .04  |
| Independent, no lean x \$6,000 to \$11,999   | 6,751  | 0.7% | .62 | .14 | .23  | .16  |
| Independent, no lean x \$12,000 to \$23,999  | 12,217 | 1.3% | .68 | .19 | .32  | .25  |
| Independent, no lean x \$24,000 to \$35,999  | 11,799 | 1.3% | .61 | .16 | .03  | .08  |
| Independent, no lean x \$36,000 to \$47,999  | 11,047 | 1.2% | .67 | .16 | .09  | .07  |
| Independent, no lean x \$48,000 to \$59,999  | 10,448 | 1.1% | .61 | .14 | .08  | .11  |
| Independent, no lean x \$60,000 to \$89,999  | 12,074 | 1.3% | .62 | .15 | .16  | .23  |
| Independent, no lean x \$90,000 to \$119,999 | 7,383  | 0.8% | .62 | .09 | .04  | .12  |
| Independent, no lean x \$120,000 and over    | 11,555 | 1.2% | .49 | .07 | -.09 | -.06 |
| Lean Democrat x Under \$720                  | 2,972  | 0.3% | .75 | .13 | .25  | .19  |
| Lean Democrat x \$720 to \$5,999             | 3,017  | 0.3% | .62 | .13 | .22  | .20  |
| Lean Democrat x \$6,000 to \$11,999          | 7,868  | 0.8% | .77 | .19 | .27  | .08  |
| Lean Democrat x \$12,000 to \$23,999         | 15,891 | 1.7% | .78 | .25 | .32  | .22  |
| Lean Democrat x \$24,000 to \$35,999         | 16,340 | 1.7% | .75 | .26 | .22  | .15  |

|                                          |         |       |     |     |      |      |
|------------------------------------------|---------|-------|-----|-----|------|------|
| Lean Democrat x \$36,000 to \$47,999     | 15,612  | 1.7%  | .73 | .27 | .27  | .18  |
| Lean Democrat x \$48,000 to \$59,999     | 14,503  | 1.5%  | .72 | .24 | .22  | .14  |
| Lean Democrat x \$60,000 to \$89,999     | 20,120  | 2.1%  | .68 | .27 | .23  | .14  |
| Lean Democrat x \$90,000 to \$119,999    | 10,844  | 1.2%  | .64 | .22 | .22  | .15  |
| Lean Democrat x \$120,000 and over       | 17,848  | 1.9%  | .65 | .25 | .20  | .08  |
| Democrat x Under \$720                   | 7,252   | 0.8%  | .21 | .02 | -.22 | -.14 |
| Democrat x \$720 to \$5,999              | 7,502   | 0.8%  | .28 | .03 | .13  | -.07 |
| Democrat x \$6,000 to \$11,999           | 21,327  | 2.3%  | .45 | .15 | .46  | .42  |
| Democrat x \$12,000 to \$23,999          | 41,275  | 4.4%  | .37 | .15 | .28  | .31  |
| Democrat x \$24,000 to \$35,999          | 41,577  | 4.4%  | .44 | .17 | .14  | .10  |
| Democrat x \$36,000 to \$47,999          | 38,544  | 4.1%  | .52 | .17 | .29  | .26  |
| Democrat x \$48,000 to \$59,999          | 35,124  | 3.7%  | .61 | .18 | .30  | .20  |
| Democrat x \$60,000 to \$89,999          | 48,463  | 5.1%  | .63 | .18 | .21  | .19  |
| Democrat x \$90,000 to \$119,999         | 24,886  | 2.6%  | .62 | .15 | .17  | .11  |
| Democrat x \$120,000 and over            | 40,605  | 4.3%  | .62 | .16 | .15  | .15  |
| Less than high school diploma x White    | 39,258  | 4.2%  | .78 | .37 | .22  | .17  |
| Less than high school diploma x Other    | 2,475   | 0.3%  | .73 | .18 | .14  | .19  |
| Less than high school diploma x Black    | 7,838   | 0.8%  | .57 | .08 | .20  | .04  |
| Less than high school diploma x Asian    | 698     | 0.1%  | .20 | .02 | .10  | .07  |
| Less than high school diploma x Hispanic | 11,916  | 1.3%  | .69 | .26 | .33  | .26  |
| High school degree or diploma x White    | 132,458 | 14.1% | .69 | .39 | .02  | .02  |
| High school degree or diploma x Other    | 4,794   | 0.5%  | .73 | .16 | .41  | .23  |
| High school degree or diploma x Black    | 15,858  | 1.7%  | .62 | .17 | .32  | .14  |
| High school degree or diploma x Asian    | 1,949   | 0.2%  | .41 | .05 | .11  | .08  |

|                                           |         |       |     |     |      |      |
|-------------------------------------------|---------|-------|-----|-----|------|------|
| High school degree or diploma x Hispanic  | 13,598  | 1.4%  | .65 | .22 | .26  | .26  |
| Technical/Vocational school x White       | 69,291  | 7.4%  | .61 | .31 | .04  | .05  |
| Technical/Vocational school x Other       | 2,443   | 0.3%  | .58 | .08 | -.07 | -.22 |
| Technical/Vocational school x Black       | 7,945   | 0.8%  | .30 | .05 | -.12 | .05  |
| Technical/Vocational school x Asian       | 1,280   | 0.1%  | .03 | .00 | -.07 | -.26 |
| Technical/Vocational school x Hispanic    | 7,321   | 0.8%  | .51 | .06 | .16  | .19  |
| Some college x White                      | 174,247 | 18.5% | .64 | .35 | .15  | .17  |
| Some college x Other                      | 6,502   | 0.7%  | .59 | .12 | .29  | .21  |
| Some college x Black                      | 20,068  | 2.1%  | .69 | .21 | .46  | .42  |
| Some college x Asian                      | 3,527   | 0.4%  | .39 | .08 | -.04 | .03  |
| Some college x Hispanic                   | 13,013  | 1.4%  | .46 | .12 | .16  | .19  |
| College graduate x White                  | 169,805 | 18.0% | .69 | .37 | .12  | .08  |
| College graduate x Other                  | 5,005   | 0.5%  | .58 | .12 | .20  | .17  |
| College graduate x Black                  | 14,405  | 1.5%  | .61 | .10 | .38  | .15  |
| College graduate x Asian                  | 5,307   | 0.6%  | .46 | .06 | .07  | .03  |
| College graduate x Hispanic               | 9,218   | 1.0%  | .34 | .08 | -.01 | .11  |
| Post graduate work or degree x White      | 170,181 | 18.1% | .83 | .45 | .25  | .16  |
| Post graduate work or degree x Other      | 4,534   | 0.5%  | .56 | .11 | .24  | .06  |
| Post graduate work or degree x Black      | 12,895  | 1.4%  | .48 | .08 | -.03 | -.02 |
| Post graduate work or degree x Asian      | 6,657   | 0.7%  | .48 | .07 | -.02 | -.02 |
| Post graduate work or degree x Hispanic   | 6,999   | 0.7%  | .37 | .08 | .17  | .28  |
| Less than high school diploma x Northeast | 10,053  | 1.1%  | .79 | .16 | .27  | .13  |
| Less than high school diploma x Midwest   | 13,313  | 1.4%  | .82 | .24 | .36  | .22  |
| Less than high school diploma x South     | 25,963  | 2.8%  | .78 | .31 | .31  | .22  |
| Less than high school diploma x West      | 12,856  | 1.4%  | .76 | .22 | .15  | .09  |
| High school degree or diploma x Northeast | 32,484  | 3.5%  | .51 | .18 | .00  | .00  |
| High school degree or diploma x Midwest   | 42,732  | 4.5%  | .69 | .30 | .10  | .06  |
| High school degree or                     | 61,481  | 6.5%  | .60 | .27 | .04  | .05  |

|                                                                           |        |      |     |     |      |      |
|---------------------------------------------------------------------------|--------|------|-----|-----|------|------|
| diploma x South                                                           |        |      |     |     |      |      |
| High school degree or diploma x West                                      | 31,960 | 3.4% | .60 | .22 | .11  | .11  |
| Technical/Vocational school x Northeast                                   | 15,106 | 1.6% | .33 | .08 | -.19 | -.10 |
| Technical/Vocational school x Midwest                                     | 21,905 | 2.3% | .58 | .17 | -.04 | -.08 |
| Technical/Vocational school x South                                       | 32,028 | 3.4% | .45 | .15 | .08  | .04  |
| Technical/Vocational school x West                                        | 19,241 | 2.0% | .52 | .12 | .04  | -.02 |
| Some college x Northeast                                                  | 35,030 | 3.7% | .49 | .16 | .26  | .26  |
| Some college x Midwest                                                    | 47,843 | 5.1% | .68 | .27 | .11  | .12  |
| Some college x South                                                      | 79,001 | 8.4% | .53 | .21 | .21  | .20  |
| Some college x West                                                       | 55,483 | 5.9% | .55 | .21 | .23  | .20  |
| College graduate x Northeast                                              | 39,638 | 4.2% | .53 | .19 | .06  | .04  |
| College graduate x Midwest                                                | 43,330 | 4.6% | .56 | .18 | .07  | .06  |
| College graduate x South                                                  | 72,075 | 7.7% | .45 | .18 | .00  | -.04 |
| College graduate x West                                                   | 48,697 | 5.2% | .70 | .24 | .34  | .30  |
| Post graduate work or degree x Northeast                                  | 41,843 | 4.4% | .77 | .27 | .23  | .07  |
| Post graduate work or degree x Midwest                                    | 39,677 | 4.2% | .81 | .28 | .29  | .21  |
| Post graduate work or degree x South                                      | 69,026 | 7.3% | .79 | .29 | .20  | .12  |
| Post graduate work or degree x West                                       | 50,720 | 5.4% | .80 | .31 | .17  | .10  |
| Less than high school diploma x Employed Full Time -Employer-             | 23,313 | 2.5% | .74 | .29 | .17  | .18  |
| Less than high school diploma x Employed Full Time -Self-                 | 7,991  | 0.8% | .84 | .19 | .55  | .37  |
| Less than high school diploma x Employed Part Time, Do Not Want Full Time | 11,423 | 1.2% | .80 | .20 | .30  | .14  |
| Less than high school diploma x Unemployed                                | 9,687  | 1.0% | .79 | .20 | .30  | .11  |
| Less than high school diploma x Employed Part Time, Want Full Time        | 9,771  | 1.0% | .71 | .17 | -.04 | -.05 |
| High school degree or diploma x Employed Full Time -Employer-             | 69,913 | 7.4% | .58 | .27 | .09  | .09  |



|                                                                           |         |       |     |     |      |      |
|---------------------------------------------------------------------------|---------|-------|-----|-----|------|------|
| High school degree or diploma x Employed Full Time -Self-                 | 21,706  | 2.3%  | .62 | .19 | .00  | .00  |
| High school degree or diploma x Employed Part Time, Do Not Want Full Time | 32,250  | 3.4%  | .58 | .22 | .00  | .08  |
| High school degree or diploma x Unemployed                                | 22,079  | 2.3%  | .68 | .19 | .10  | .06  |
| High school degree or diploma x Employed Part Time, Want Full Time        | 22,709  | 2.4%  | .68 | .20 | .09  | .06  |
| Technical/Vocational school x Employed Full Time - Employer-              | 43,380  | 4.6%  | .41 | .16 | -.10 | -.08 |
| Technical/Vocational school x Employed Full Time -Self-                   | 10,758  | 1.1%  | .56 | .12 | .19  | .17  |
| Technical/Vocational school x Employed Part Time, Do Not Want Full Time   | 14,630  | 1.6%  | .48 | .12 | -.06 | -.03 |
| Technical/Vocational school x Unemployed                                  | 9,490   | 1.0%  | .60 | .09 | .24  | .15  |
| Technical/Vocational school x Employed Part Time, Want Full Time          | 10,022  | 1.1%  | .51 | .11 | -.11 | -.13 |
| Some college x Employed Full Time -Employer-                              | 101,506 | 10.8% | .51 | .23 | .11  | .15  |
| Some college x Employed Full Time -Self-                                  | 26,440  | 2.8%  | .61 | .19 | .31  | .27  |
| Some college x Employed Part Time, Do Not Want Full Time                  | 39,188  | 4.2%  | .54 | .20 | .30  | .26  |
| Some college x Unemployed                                                 | 24,116  | 2.6%  | .70 | .18 | .21  | .22  |
| Some college x Employed Part Time, Want Full Time                         | 26,107  | 2.8%  | .63 | .17 | .14  | .10  |
| College graduate x Employed Full Time - Employer-                         | 111,991 | 11.9% | .55 | .25 | .11  | .07  |
| College graduate x Employed Full Time -Self-                              | 22,755  | 2.4%  | .65 | .20 | .28  | .19  |
| College graduate x Employed Part Time, Do Not Want Full Time              | 32,180  | 3.4%  | .53 | .17 | -.03 | .02  |
| College graduate x Unemployed                                             | 17,673  | 1.9%  | .55 | .11 | .01  | .12  |
| College graduate x                                                        | 19,141  | 2.0%  | .56 | .15 | .05  | .05  |

|                                                                          |         |       |     |     |      |      |
|--------------------------------------------------------------------------|---------|-------|-----|-----|------|------|
| Employed Part Time, Want Full Time                                       |         |       |     |     |      |      |
| Post graduate work or degree x Employed Full Time - Employer-            | 113,005 | 12.0% | .77 | .34 | .13  | .05  |
| Post graduate work or degree x Employed Full Time -Self-                 | 22,877  | 2.4%  | .80 | .24 | .27  | .17  |
| Post graduate work or degree x Employed Part Time, Do Not Want Full Time | 34,378  | 3.7%  | .82 | .30 | .36  | .25  |
| Post graduate work or degree x Unemployed                                | 14,337  | 1.5%  | .79 | .16 | .24  | .04  |
| Post graduate work or degree x Employed Part Time, Want Full Time        | 16,669  | 1.8%  | .82 | .19 | .28  | .16  |
| Less than high school diploma x Under \$720                              | 4,041   | 0.4%  | .70 | .11 | .16  | .11  |
| Less than high school diploma x \$720 to \$5,999                         | 4,164   | 0.4%  | .66 | .08 | .05  | -.03 |
| Less than high school diploma x \$6,000 to \$11,999                      | 11,477  | 1.2%  | .74 | .19 | .24  | .10  |
| Less than high school diploma x \$12,000 to \$23,999                     | 14,756  | 1.6%  | .79 | .27 | .27  | .21  |
| Less than high school diploma x \$24,000 to \$35,999                     | 9,209   | 1.0%  | .79 | .19 | .32  | .22  |
| Less than high school diploma x \$36,000 to \$47,999                     | 6,366   | 0.7%  | .69 | .13 | .13  | .09  |
| Less than high school diploma x \$48,000 to \$59,999                     | 4,498   | 0.5%  | .69 | .11 | .32  | .14  |
| Less than high school diploma x \$60,000 to \$89,999                     | 3,845   | 0.4%  | .69 | .15 | .10  | .11  |
| Less than high school diploma x \$90,000 to \$119,999                    | 1,868   | 0.2%  | .61 | .05 | .14  | .05  |
| Less than high school diploma x \$120,000 and over                       | 1,961   | 0.2%  | .57 | .09 | .01  | -.05 |
| High school degree or diploma x Under \$720                              | 5,621   | 0.6%  | .60 | .07 | .04  | .05  |
| High school degree or diploma x \$720 to \$5,999                         | 5,935   | 0.6%  | .45 | .09 | -.02 | .08  |
| High school degree or                                                    | 15,890  | 1.7%  | .71 | .19 | .29  | .20  |

|                                                       |        |      |     |     |      |      |
|-------------------------------------------------------|--------|------|-----|-----|------|------|
| diploma x \$6,000 to \$11,999                         |        |      |     |     |      |      |
| High school degree or diploma x \$12,000 to \$23,999  | 33,529 | 3.6% | .70 | .23 | .21  | .19  |
| High school degree or diploma x \$24,000 to \$35,999  | 30,265 | 3.2% | .63 | .21 | .06  | .05  |
| High school degree or diploma x \$36,000 to \$47,999  | 23,310 | 2.5% | .56 | .18 | .04  | .03  |
| High school degree or diploma x \$48,000 to \$59,999  | 18,323 | 1.9% | .52 | .15 | -.02 | -.05 |
| High school degree or diploma x \$60,000 to \$89,999  | 18,191 | 1.9% | .44 | .11 | -.17 | -.17 |
| High school degree or diploma x \$90,000 to \$119,999 | 7,621  | 0.8% | .39 | .06 | -.18 | -.16 |
| High school degree or diploma x \$120,000 and over    | 9,972  | 1.1% | .47 | .16 | .01  | .09  |
| Technical/Vocational school x Under \$720             | 2,126  | 0.2% | .35 | .05 | .00  | -.01 |
| Technical/Vocational school x \$720 to \$5,999        | 2,534  | 0.3% | .34 | .03 | .03  | -.08 |
| Technical/Vocational school x \$6,000 to \$11,999     | 5,926  | 0.6% | .73 | .12 | .30  | .22  |
| Technical/Vocational school x \$12,000 to \$23,999    | 12,635 | 1.3% | .60 | .15 | .20  | .20  |
| Technical/Vocational school x \$24,000 to \$35,999    | 13,749 | 1.5% | .51 | .14 | -.06 | -.15 |
| Technical/Vocational school x \$36,000 to \$47,999    | 12,821 | 1.4% | .41 | .11 | -.15 | -.07 |
| Technical/Vocational school x \$48,000 to \$59,999    | 11,471 | 1.2% | .38 | .05 | .07  | -.05 |
| Technical/Vocational school x \$60,000 to \$89,999    | 13,076 | 1.4% | .37 | .09 | -.13 | -.14 |
| Technical/Vocational school x \$90,000 to \$119,999   | 6,407  | 0.7% | .15 | .00 | -.36 | -.31 |
| Technical/Vocational school x \$120,000 and over      | 7,535  | 0.8% | .29 | .03 | -.06 | -.09 |
| Some college x Under \$720                            | 3,903  | 0.4% | .58 | .08 | .21  | .23  |
| Some college x \$720 to \$5,999                       | 4,334  | 0.5% | .46 | .02 | .28  | .16  |
| Some college x \$6,000 to \$11,999                    | 11,769 | 1.3% | .76 | .15 | .18  | .18  |

|                                                     |        |      |     |     |      |      |
|-----------------------------------------------------|--------|------|-----|-----|------|------|
| Some college x \$12,000 to \$23,999                 | 27,536 | 2.9% | .70 | .22 | .21  | .12  |
| Some college x \$24,000 to \$35,999                 | 32,036 | 3.4% | .58 | .19 | .12  | .13  |
| Some college x \$36,000 to \$47,999                 | 31,157 | 3.3% | .53 | .18 | .21  | .25  |
| Some college x \$48,000 to \$59,999                 | 28,214 | 3.0% | .51 | .15 | .03  | .02  |
| Some college x \$60,000 to \$89,999                 | 36,829 | 3.9% | .45 | .14 | .35  | .31  |
| Some college x \$90,000 to \$119,999                | 17,542 | 1.9% | .32 | .10 | -.11 | .04  |
| Some college x \$120,000 and over                   | 24,037 | 2.6% | .45 | .13 | .10  | .09  |
| College graduate x Under \$720                      | 2,496  | 0.3% | .23 | .02 | -.28 | -.19 |
| College graduate x \$720 to \$5,999                 | 2,378  | 0.3% | .19 | .04 | .10  | .09  |
| College graduate x \$6,000 to \$11,999              | 5,809  | 0.6% | .61 | .09 | .20  | .16  |
| College graduate x \$12,000 to \$23,999             | 14,742 | 1.6% | .71 | .16 | .20  | .16  |
| College graduate x \$24,000 to \$35,999             | 21,482 | 2.3% | .62 | .16 | -.14 | -.12 |
| College graduate x \$36,000 to \$47,999             | 24,903 | 2.6% | .66 | .19 | .15  | .12  |
| College graduate x \$48,000 to \$59,999             | 26,366 | 2.8% | .54 | .18 | .08  | .09  |
| College graduate x \$60,000 to \$89,999             | 42,351 | 4.5% | .61 | .19 | .28  | .16  |
| College graduate x \$90,000 to \$119,999            | 23,634 | 2.5% | .53 | .12 | .08  | .06  |
| College graduate x \$120,000 and over               | 39,579 | 4.2% | .48 | .16 | .07  | .08  |
| Post graduate work or degree x Under \$720          | 1,465  | 0.2% | .29 | .00 | .05  | .05  |
| Post graduate work or degree x \$720 to \$5,999     | 1,415  | 0.2% | .31 | .01 | .14  | .16  |
| Post graduate work or degree x \$6,000 to \$11,999  | 3,394  | 0.4% | .77 | .08 | .31  | .18  |
| Post graduate work or degree x \$12,000 to \$23,999 | 8,815  | 0.9% | .70 | .14 | .06  | -.01 |
| Post graduate work or degree x \$24,000 to \$35,999 | 14,551 | 1.5% | .80 | .17 | .19  | .07  |
| Post graduate work or degree x \$36,000 to \$47,999 | 20,066 | 2.1% | .86 | .26 | .37  | .25  |

|                                                         |         |       |     |     |      |      |
|---------------------------------------------------------|---------|-------|-----|-----|------|------|
| Post graduate work or degree<br>x \$48,000 to \$59,999  | 23,729  | 2.5%  | .76 | .21 | .16  | .12  |
| Post graduate work or degree<br>x \$60,000 to \$89,999  | 42,239  | 4.5%  | .81 | .29 | .17  | .11  |
| Post graduate work or degree<br>x \$90,000 to \$119,999 | 27,396  | 2.9%  | .77 | .24 | .16  | .03  |
| Post graduate work or degree<br>x \$120,000 and over    | 58,196  | 6.2%  | .75 | .27 | .20  | .12  |
| White x Northeast                                       | 144,844 | 15.4% | .69 | .38 | .13  | .08  |
| White x Midwest                                         | 182,436 | 19.4% | .74 | .42 | .12  | .09  |
| White x South                                           | 259,866 | 27.6% | .71 | .42 | .13  | .09  |
| White x West                                            | 168,094 | 17.9% | .75 | .40 | .26  | .21  |
| Other x Northeast                                       | 3,776   | 0.4%  | .53 | .09 | .37  | .30  |
| Other x Midwest                                         | 4,067   | 0.4%  | .53 | .08 | .12  | -.04 |
| Other x South                                           | 8,565   | 0.9%  | .75 | .22 | .32  | .26  |
| Other x West                                            | 9,345   | 1.0%  | .62 | .14 | .22  | .11  |
| Black x Northeast                                       | 12,558  | 1.3%  | .60 | .12 | .17  | .09  |
| Black x Midwest                                         | 13,712  | 1.5%  | .59 | .14 | .43  | .25  |
| Black x South                                           | 44,085  | 4.7%  | .63 | .22 | .25  | .21  |
| Black x West                                            | 8,654   | 0.9%  | .53 | .11 | .16  | .18  |
| Asian x Northeast                                       | 4,025   | 0.4%  | .32 | .05 | .20  | .18  |
| Asian x Midwest                                         | 2,604   | 0.3%  | .46 | .08 | -.07 | .02  |
| Asian x South                                           | 5,155   | 0.5%  | .42 | .08 | .10  | -.03 |
| Asian x West                                            | 7,634   | 0.8%  | .53 | .07 | -.12 | -.09 |
| Hispanic x Northeast                                    | 8,951   | 1.0%  | .43 | .07 | .18  | .04  |
| Hispanic x Midwest                                      | 5,981   | 0.6%  | .56 | .11 | .26  | .21  |
| Hispanic x South                                        | 21,903  | 2.3%  | .55 | .22 | .14  | .08  |
| Hispanic x West                                         | 25,230  | 2.7%  | .60 | .26 | .24  | .28  |
| White x Employed Full Time<br>-Employer-                | 365,942 | 38.9% | .71 | .43 | .11  | .09  |
| White x Employed Full Time<br>-Self-                    | 93,959  | 10.0% | .75 | .37 | .33  | .24  |
| White x Employed Part<br>Time, Do Not Want Full<br>Time | 140,789 | 15.0% | .70 | .38 | .18  | .16  |
| White x Unemployed                                      | 74,462  | 7.9%  | .78 | .37 | .16  | .10  |
| White x Employed Part<br>Time, Want Full Time           | 80,088  | 8.5%  | .75 | .36 | .04  | -.05 |
| Other x Employed Full Time<br>-Employer-                | 11,849  | 1.3%  | .68 | .19 | .28  | .19  |
| Other x Employed Full Time<br>-Self-                    | 3,176   | 0.3%  | .49 | .11 | .03  | -.07 |
| Other x Employed Part                                   | 3,720   | 0.4%  | .72 | .12 | .37  | .09  |

|                                                      |         |       |     |     |      |      |
|------------------------------------------------------|---------|-------|-----|-----|------|------|
| Time, Do Not Want Full Time                          |         |       |     |     |      |      |
| Other x Unemployed                                   | 3,364   | 0.4%  | .62 | .11 | .27  | .24  |
| Other x Employed Part Time, Want Full Time           | 3,644   | 0.4%  | .69 | .11 | .29  | .20  |
| Black x Employed Full Time -Employer-                | 40,093  | 4.3%  | .58 | .20 | .23  | .17  |
| Black x Employed Full Time -Self-                    | 7,850   | 0.8%  | .58 | .10 | .20  | .07  |
| Black x Employed Part Time, Do Not Want Full Time    | 10,373  | 1.1%  | .52 | .10 | .34  | .28  |
| Black x Unemployed                                   | 10,195  | 1.1%  | .61 | .11 | .26  | .16  |
| Black x Employed Part Time, Want Full Time           | 10,498  | 1.1%  | .65 | .14 | .24  | .02  |
| Asian x Employed Full Time -Employer-                | 11,318  | 1.2%  | .45 | .09 | -.06 | -.06 |
| Asian x Employed Full Time -Self-                    | 1,781   | 0.2%  | .44 | .05 | .07  | .21  |
| Asian x Employed Part Time, Do Not Want Full Time    | 2,471   | 0.3%  | .48 | .06 | .10  | .14  |
| Asian x Unemployed                                   | 1,694   | 0.2%  | .31 | .04 | .01  | -.19 |
| Asian x Employed Part Time, Want Full Time           | 2,154   | 0.2%  | .49 | .10 | .11  | .10  |
| Hispanic x Employed Full Time -Employer-             | 33,906  | 3.6%  | .52 | .20 | .12  | .13  |
| Hispanic x Employed Full Time -Self-                 | 5,761   | 0.6%  | .57 | .15 | .18  | .17  |
| Hispanic x Employed Part Time, Do Not Want Full Time | 6,696   | 0.7%  | .58 | .10 | .26  | .17  |
| Hispanic x Unemployed                                | 7,667   | 0.8%  | .55 | .13 | .27  | .18  |
| Hispanic x Employed Part Time, Want Full Time        | 8,035   | 0.9%  | .61 | .17 | .30  | .23  |
| White x Under \$720                                  | 12,946  | 1.4%  | .70 | .15 | -.04 | .01  |
| White x \$720 to \$5,999                             | 13,772  | 1.5%  | .71 | .16 | .10  | .03  |
| White x \$6,000 to \$11,999                          | 36,420  | 3.9%  | .79 | .32 | .32  | .21  |
| White x \$12,000 to \$23,999                         | 82,773  | 8.8%  | .76 | .41 | .15  | .10  |
| White x \$24,000 to \$35,999                         | 95,529  | 10.1% | .71 | .37 | .00  | -.01 |
| White x \$36,000 to \$47,999                         | 96,176  | 10.2% | .74 | .39 | .20  | .20  |
| White x \$48,000 to \$59,999                         | 93,004  | 9.9%  | .69 | .34 | .11  | .10  |
| White x \$60,000 to \$89,999                         | 131,531 | 14.0% | .73 | .36 | .23  | .15  |
| White x \$90,000 to \$119,999                        | 71,419  | 7.6%  | .70 | .31 | .04  | -.04 |

|                                 |         |       |     |     |      |      |
|---------------------------------|---------|-------|-----|-----|------|------|
| White x \$120,000 and over      | 121,670 | 12.9% | .69 | .33 | .18  | .11  |
| Other x Under \$720             | 858     | 0.1%  | .49 | .07 | .27  | .15  |
| Other x \$720 to \$5,999        | 832     | 0.1%  | .58 | .07 | .09  | .27  |
| Other x \$6,000 to \$11,999     | 2,262   | 0.2%  | .69 | .13 | .09  | .07  |
| Other x \$12,000 to \$23,999    | 3,884   | 0.4%  | .73 | .13 | .36  | .24  |
| Other x \$24,000 to \$35,999    | 3,482   | 0.4%  | .62 | .13 | .03  | .04  |
| Other x \$36,000 to \$47,999    | 3,148   | 0.3%  | .63 | .10 | .36  | .24  |
| Other x \$48,000 to \$59,999    | 2,827   | 0.3%  | .57 | .10 | -.07 | -.02 |
| Other x \$60,000 to \$89,999    | 3,607   | 0.4%  | .64 | .14 | .40  | .30  |
| Other x \$90,000 to \$119,999   | 1,854   | 0.2%  | .38 | .05 | -.06 | .00  |
| Other x \$120,000 and over      | 2,999   | 0.3%  | .48 | .06 | .20  | .04  |
| Black x Under \$720             | 3,002   | 0.3%  | .57 | .06 | .28  | .15  |
| Black x \$720 to \$5,999        | 3,024   | 0.3%  | .25 | .01 | -.10 | -.11 |
| Black x \$6,000 to \$11,999     | 8,239   | 0.9%  | .59 | .08 | .09  | .11  |
| Black x \$12,000 to \$23,999    | 12,261  | 1.3%  | .55 | .11 | .38  | .24  |
| Black x \$24,000 to \$35,999    | 11,236  | 1.2%  | .64 | .17 | .48  | .42  |
| Black x \$36,000 to \$47,999    | 9,957   | 1.1%  | .54 | .10 | .02  | -.03 |
| Black x \$48,000 to \$59,999    | 8,461   | 0.9%  | .68 | .12 | .37  | .31  |
| Black x \$60,000 to \$89,999    | 10,540  | 1.1%  | .62 | .10 | .17  | -.08 |
| Black x \$90,000 to \$119,999   | 5,309   | 0.6%  | .30 | .05 | -.04 | -.05 |
| Black x \$120,000 and over      | 6,980   | 0.7%  | .41 | .07 | .15  | .12  |
| Asian x Under \$720             | 500     | 0.1%  | .26 | .02 | .01  | .14  |
| Asian x \$720 to \$5,999        | 404     | 0.0%  | .31 | .01 | .20  | .56  |
| Asian x \$6,000 to \$11,999     | 772     | 0.1%  | .36 | .04 | .06  | .14  |
| Asian x \$12,000 to \$23,999    | 1,567   | 0.2%  | .33 | .04 | .05  | -.02 |
| Asian x \$24,000 to \$35,999    | 1,931   | 0.2%  | .39 | .05 | .15  | .12  |
| Asian x \$36,000 to \$47,999    | 2,080   | 0.2%  | .32 | .05 | .03  | .01  |
| Asian x \$48,000 to \$59,999    | 2,117   | 0.2%  | .35 | .04 | -.20 | -.18 |
| Asian x \$60,000 to \$89,999    | 3,497   | 0.4%  | .50 | .06 | -.02 | -.08 |
| Asian x \$90,000 to \$119,999   | 2,059   | 0.2%  | .21 | .02 | -.04 | -.01 |
| Asian x \$120,000 and over      | 4,491   | 0.5%  | .45 | .05 | .00  | -.17 |
| Hispanic x Under \$720          | 2,346   | 0.2%  | .47 | .06 | .13  | .05  |
| Hispanic x \$720 to \$5,999     | 2,728   | 0.3%  | .26 | .02 | .11  | .06  |
| Hispanic x \$6,000 to \$11,999  | 6,572   | 0.7%  | .64 | .16 | .31  | .23  |
| Hispanic x \$12,000 to \$23,999 | 11,528  | 1.2%  | .68 | .20 | .36  | .26  |
| Hispanic x \$24,000 to \$35,999 | 9,114   | 1.0%  | .63 | .16 | .16  | .11  |
| Hispanic x \$36,000 to \$47,999 | 7,262   | 0.8%  | .53 | .12 | .21  | .24  |
| Hispanic x \$48,000 to          | 6,192   | 0.7%  | .46 | .07 | .08  | .00  |

\$59,999

|                                                       |         |       |     |     |      |      |
|-------------------------------------------------------|---------|-------|-----|-----|------|------|
| Hispanic x \$60,000 to \$89,999                       | 7,356   | 0.8%  | .40 | .09 | .24  | .20  |
| Hispanic x \$90,000 to \$119,999                      | 3,827   | 0.4%  | .30 | .03 | -.01 | -.01 |
| Hispanic x \$120,000 and over                         | 5,140   | 0.5%  | .30 | .06 | -.15 | -.09 |
| Northeast x Employed Full Time -Employer-             | 86,896  | 9.2%  | .57 | .27 | .13  | .11  |
| Northeast x Employed Full Time -Self-                 | 19,552  | 2.1%  | .65 | .18 | .23  | .17  |
| Northeast x Employed Part Time, Do Not Want Full Time | 29,926  | 3.2%  | .61 | .18 | .12  | .03  |
| Northeast x Unemployed                                | 18,356  | 1.9%  | .57 | .15 | -.01 | -.01 |
| Northeast x Employed Part Time, Want Full Time        | 19,424  | 2.1%  | .64 | .17 | .27  | .19  |
| Midwest x Employed Full Time -Employer-               | 104,204 | 11.1% | .69 | .33 | .10  | .08  |
| Midwest x Employed Full Time -Self-                   | 23,677  | 2.5%  | .72 | .22 | .25  | .15  |
| Midwest x Employed Part Time, Do Not Want Full Time   | 37,774  | 4.0%  | .67 | .25 | .21  | .12  |
| Midwest x Unemployed                                  | 20,605  | 2.2%  | .75 | .20 | .25  | .13  |
| Midwest x Employed Part Time, Want Full Time          | 22,540  | 2.4%  | .70 | .19 | -.07 | -.06 |
| South x Employed Full Time -Employer-                 | 169,311 | 18.0% | .57 | .29 | .09  | .07  |
| South x Employed Full Time -Self-                     | 41,394  | 4.4%  | .65 | .25 | .24  | .17  |
| South x Employed Part Time, Do Not Want Full Time     | 56,675  | 6.0%  | .64 | .25 | .18  | .17  |
| South x Unemployed                                    | 35,273  | 3.7%  | .69 | .20 | .20  | .18  |
| South x Employed Part Time, Want Full Time            | 36,921  | 3.9%  | .63 | .18 | -.02 | -.14 |
| West x Employed Full Time -Employer-                  | 102,697 | 10.9% | .62 | .27 | .10  | .09  |
| West x Employed Full Time -Self-                      | 27,904  | 3.0%  | .73 | .24 | .33  | .23  |
| West x Employed Part Time, Do Not Want Full Time      | 39,674  | 4.2%  | .71 | .25 | .29  | .25  |
| West x Unemployed                                     | 23,148  | 2.5%  | .73 | .20 | .28  | .21  |
| West x Employed Part Time, Want Full Time             | 25,534  | 2.7%  | .73 | .22 | .20  | .12  |



|                                   |        |      |     |     |      |      |
|-----------------------------------|--------|------|-----|-----|------|------|
| Northeast x Under \$720           | 3,198  | 0.3% | .54 | .07 | -.06 | -.14 |
| Northeast x \$720 to \$5,999      | 3,655  | 0.4% | .38 | .06 | .23  | .09  |
| Northeast x \$6,000 to \$11,999   | 9,126  | 1.0% | .68 | .12 | .27  | .19  |
| Northeast x \$12,000 to \$23,999  | 18,994 | 2.0% | .57 | .15 | .10  | -.01 |
| Northeast x \$24,000 to \$35,999  | 21,346 | 2.3% | .57 | .17 | .22  | .24  |
| Northeast x \$36,000 to \$47,999  | 20,774 | 2.2% | .61 | .19 | .14  | .19  |
| Northeast x \$48,000 to \$59,999  | 20,931 | 2.2% | .60 | .17 | .04  | .03  |
| Northeast x \$60,000 to \$89,999  | 29,051 | 3.1% | .57 | .15 | .04  | -.02 |
| Northeast x \$90,000 to \$119,999 | 16,589 | 1.8% | .50 | .13 | .07  | .09  |
| Northeast x \$120,000 and over    | 30,490 | 3.2% | .57 | .18 | .12  | .05  |
| Midwest x Under \$720             | 4,513  | 0.5% | .52 | .07 | -.04 | .01  |
| Midwest x \$720 to \$5,999        | 4,746  | 0.5% | .59 | .10 | -.05 | .01  |
| Midwest x \$6,000 to \$11,999     | 11,935 | 1.3% | .80 | .20 | .36  | .23  |
| Midwest x \$12,000 to \$23,999    | 26,382 | 2.8% | .76 | .26 | .17  | .09  |
| Midwest x \$24,000 to \$35,999    | 29,112 | 3.1% | .68 | .23 | -.08 | -.10 |
| Midwest x \$36,000 to \$47,999    | 27,785 | 3.0% | .72 | .22 | .16  | .11  |
| Midwest x \$48,000 to \$59,999    | 25,750 | 2.7% | .63 | .19 | .04  | -.02 |
| Midwest x \$60,000 to \$89,999    | 34,379 | 3.7% | .70 | .23 | .36  | .25  |
| Midwest x \$90,000 to \$119,999   | 17,298 | 1.8% | .65 | .16 | -.06 | -.02 |
| Midwest x \$120,000 and over      | 26,900 | 2.9% | .63 | .18 | .13  | .16  |
| South x Under \$720               | 7,801  | 0.8% | .46 | .06 | -.05 | -.01 |
| South x \$720 to \$5,999          | 8,138  | 0.9% | .54 | .06 | .03  | -.01 |
| South x \$6,000 to \$11,999       | 21,934 | 2.3% | .71 | .22 | .11  | .08  |
| South x \$12,000 to \$23,999      | 42,075 | 4.5% | .75 | .32 | .36  | .25  |
| South x \$24,000 to \$35,999      | 43,779 | 4.6% | .63 | .24 | .04  | .03  |
| South x \$36,000 to \$47,999      | 42,603 | 4.5% | .58 | .19 | .13  | .11  |
| South x \$48,000 to \$59,999      | 40,202 | 4.3% | .51 | .19 | .13  | .15  |
| South x \$60,000 to \$89,999      | 54,840 | 5.8% | .57 | .20 | .16  | .12  |
| South x \$90,000 to \$119,999     | 29,676 | 3.2% | .48 | .12 | -.06 | -.12 |

|                                                              |        |      |     |     |      |      |
|--------------------------------------------------------------|--------|------|-----|-----|------|------|
| South x \$120,000 and over                                   | 48,526 | 5.2% | .59 | .19 | .11  | .07  |
| West x Under \$720                                           | 4,140  | 0.4% | .56 | .07 | .22  | .19  |
| West x \$720 to \$5,999                                      | 4,221  | 0.4% | .45 | .07 | .12  | .15  |
| West x \$6,000 to \$11,999                                   | 11,270 | 1.2% | .78 | .18 | .47  | .29  |
| West x \$12,000 to \$23,999                                  | 24,562 | 2.6% | .71 | .23 | .13  | .08  |
| West x \$24,000 to \$35,999                                  | 27,055 | 2.9% | .64 | .18 | .14  | .06  |
| West x \$36,000 to \$47,999                                  | 27,461 | 2.9% | .66 | .24 | .22  | .21  |
| West x \$48,000 to \$59,999                                  | 25,718 | 2.7% | .61 | .17 | .12  | .14  |
| West x \$60,000 to \$89,999                                  | 38,261 | 4.1% | .69 | .21 | .20  | .10  |
| West x \$90,000 to \$119,999                                 | 20,905 | 2.2% | .62 | .15 | .00  | -.02 |
| West x \$120,000 and over                                    | 35,364 | 3.8% | .62 | .16 | .13  | .10  |
| Employed Full Time -<br>Employer- x Under \$720              | 4,253  | 0.5% | .50 | .07 | .17  | .20  |
| Employed Full Time -<br>Employer- x \$720 to \$5,999         | 6,129  | 0.7% | .49 | .06 | .21  | .18  |
| Employed Full Time -<br>Employer- x \$6,000 to<br>\$11,999   | 16,514 | 1.8% | .71 | .20 | .08  | .04  |
| Employed Full Time -<br>Employer- x \$12,000 to<br>\$23,999  | 41,359 | 4.4% | .73 | .29 | .38  | .31  |
| Employed Full Time -<br>Employer- x \$24,000 to<br>\$35,999  | 52,921 | 5.6% | .62 | .25 | .03  | .02  |
| Employed Full Time -<br>Employer- x \$36,000 to<br>\$47,999  | 56,868 | 6.0% | .63 | .26 | .10  | .08  |
| Employed Full Time -<br>Employer- x \$48,000 to<br>\$59,999  | 58,716 | 6.2% | .55 | .23 | -.02 | .02  |
| Employed Full Time -<br>Employer- x \$60,000 to<br>\$89,999  | 89,113 | 9.5% | .60 | .25 | .18  | .12  |
| Employed Full Time -<br>Employer- x \$90,000 to<br>\$119,999 | 50,530 | 5.4% | .56 | .18 | -.07 | -.13 |
| Employed Full Time -<br>Employer- x \$120,000 and<br>over    | 86,705 | 9.2% | .60 | .25 | .07  | .07  |
| Employed Full Time -Self- x<br>Under \$720                   | 2,039  | 0.2% | .44 | .05 | -.07 | .06  |
| Employed Full Time -Self- x<br>\$720 to \$5,999              | 2,212  | 0.2% | .49 | .06 | .29  | .18  |
| Employed Full Time -Self- x<br>\$6,000 to \$11,999           | 6,324  | 0.7% | .76 | .12 | .47  | .21  |

|                                                                         |        |      |     |     |      |      |
|-------------------------------------------------------------------------|--------|------|-----|-----|------|------|
| Employed Full Time -Self- x<br>\$12,000 to \$23,999                     | 12,964 | 1.4% | .72 | .17 | .09  | .05  |
| Employed Full Time -Self- x<br>\$24,000 to \$35,999                     | 14,070 | 1.5% | .67 | .19 | .25  | .25  |
| Employed Full Time -Self- x<br>\$36,000 to \$47,999                     | 14,267 | 1.5% | .59 | .13 | .19  | .14  |
| Employed Full Time -Self- x<br>\$48,000 to \$59,999                     | 13,338 | 1.4% | .66 | .16 | .35  | .27  |
| Employed Full Time -Self- x<br>\$60,000 to \$89,999                     | 18,356 | 1.9% | .73 | .17 | .24  | .08  |
| Employed Full Time -Self- x<br>\$90,000 to \$119,999                    | 10,062 | 1.1% | .64 | .15 | .13  | .03  |
| Employed Full Time -Self- x<br>\$120,000 and over                       | 18,895 | 2.0% | .61 | .15 | .19  | .03  |
| Employed Part Time, Do Not<br>Want Full Time x Under<br>\$720           | 3,310  | 0.4% | .51 | .05 | .19  | .17  |
| Employed Part Time, Do Not<br>Want Full Time x \$720 to<br>\$5,999      | 4,089  | 0.4% | .57 | .09 | .11  | .05  |
| Employed Part Time, Do Not<br>Want Full Time x \$6,000 to<br>\$11,999   | 11,149 | 1.2% | .74 | .17 | .26  | .14  |
| Employed Part Time, Do Not<br>Want Full Time x \$12,000 to<br>\$23,999  | 22,403 | 2.4% | .70 | .24 | .18  | .01  |
| Employed Part Time, Do Not<br>Want Full Time x \$24,000 to<br>\$35,999  | 23,465 | 2.5% | .61 | .18 | .06  | .03  |
| Employed Part Time, Do Not<br>Want Full Time x \$36,000 to<br>\$47,999  | 21,975 | 2.3% | .66 | .21 | .22  | .24  |
| Employed Part Time, Do Not<br>Want Full Time x \$48,000 to<br>\$59,999  | 19,632 | 2.1% | .63 | .17 | .13  | .09  |
| Employed Part Time, Do Not<br>Want Full Time x \$60,000 to<br>\$89,999  | 25,089 | 2.7% | .63 | .19 | .30  | .24  |
| Employed Part Time, Do Not<br>Want Full Time x \$90,000 to<br>\$119,999 | 12,796 | 1.4% | .55 | .11 | .02  | .00  |
| Employed Part Time, Do Not<br>Want Full Time x \$120,000<br>and over    | 20,141 | 2.1% | .61 | .14 | .13  | .03  |
| Unemployed x Under \$720                                                | 6,418  | 0.7% | .53 | .08 | -.18 | -.02 |
| Unemployed x \$720 to                                                   | 4,236  | 0.4% | .52 | .09 | .18  | .10  |

|                                                            |        |      |     |     |      |      |
|------------------------------------------------------------|--------|------|-----|-----|------|------|
| \$5,999                                                    |        |      |     |     |      |      |
| Unemployed x \$6,000 to \$11,999                           | 9,878  | 1.0% | .79 | .16 | .47  | .21  |
| Unemployed x \$12,000 to \$23,999                          | 17,726 | 1.9% | .67 | .17 | .10  | .09  |
| Unemployed x \$24,000 to \$35,999                          | 15,000 | 1.6% | .71 | .17 | .14  | .06  |
| Unemployed x \$36,000 to \$47,999                          | 11,969 | 1.3% | .70 | .14 | .12  | .01  |
| Unemployed x \$48,000 to \$59,999                          | 9,842  | 1.0% | .64 | .08 | .06  | -.01 |
| Unemployed x \$60,000 to \$89,999                          | 10,865 | 1.2% | .59 | .10 | -.05 | .05  |
| Unemployed x \$90,000 to \$119,999                         | 4,871  | 0.5% | .47 | .08 | .04  | -.06 |
| Unemployed x \$120,000 and over                            | 6,577  | 0.7% | .75 | .10 | .33  | .17  |
| Employed Part Time, Want Full Time x Under \$720           | 3,632  | 0.4% | .50 | .04 | .07  | .08  |
| Employed Part Time, Want Full Time x \$720 to \$5,999      | 4,094  | 0.4% | .47 | .02 | -.24 | -.14 |
| Employed Part Time, Want Full Time x \$6,000 to \$11,999   | 10,400 | 1.1% | .73 | .15 | .21  | .13  |
| Employed Part Time, Want Full Time x \$12,000 to \$23,999  | 17,561 | 1.9% | .74 | .22 | .03  | -.02 |
| Employed Part Time, Want Full Time x \$24,000 to \$35,999  | 15,836 | 1.7% | .66 | .15 | -.09 | -.01 |
| Employed Part Time, Want Full Time x \$36,000 to \$47,999  | 13,544 | 1.4% | .70 | .16 | .23  | .26  |
| Employed Part Time, Want Full Time x \$48,000 to \$59,999  | 11,073 | 1.2% | .52 | .11 | .01  | .04  |
| Employed Part Time, Want Full Time x \$60,000 to \$89,999  | 13,108 | 1.4% | .72 | .16 | .23  | .00  |
| Employed Part Time, Want Full Time x \$90,000 to \$119,999 | 6,209  | 0.7% | .57 | .09 | -.15 | -.06 |
| Employed Part Time, Want Full Time x \$120,000 and over    | 8,962  | 1.0% | .52 | .07 | .16  | .08  |

|         |         |        |     |      |      |      |
|---------|---------|--------|-----|------|------|------|
| Average | 31,838  | 3.4%   | .60 | .18  | .13  | .10  |
| Minimum | 404     | 0.043% | .03 | -.01 | -.36 | -.37 |
| Maximum | 378,763 | 40.2%  | .86 | .47  | .55  | .56  |

---

**Figure C1: Similarity of Approval/Sentiment Trends by Subgroup**

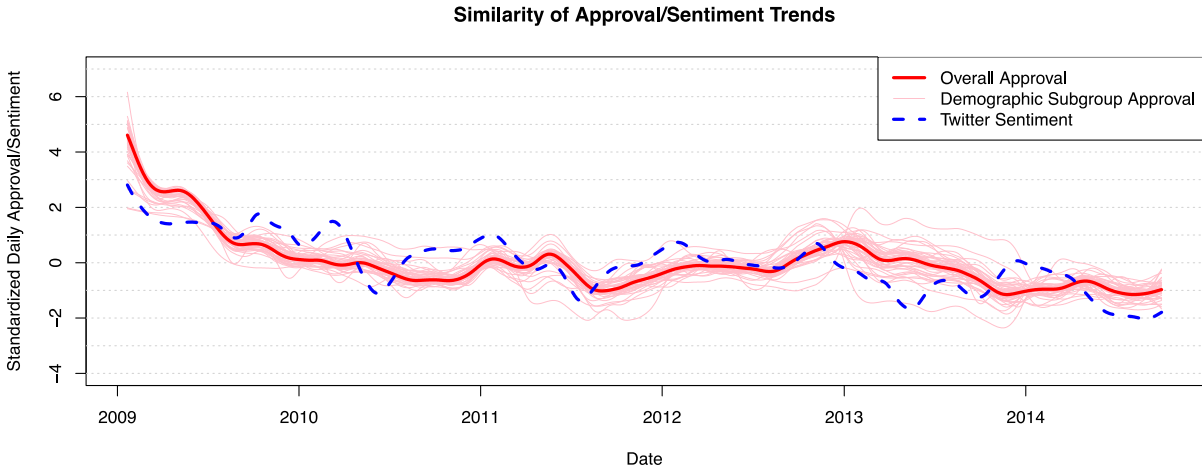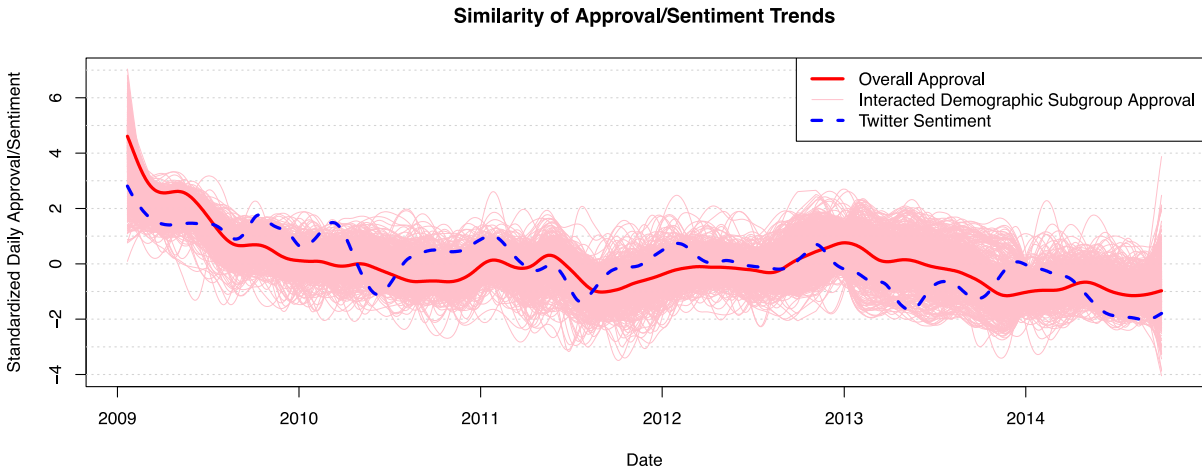

### Online Appendix D – Models for Daily Data

| Table D1 - Pearson's Correlations Between Trends for Smoothed and Daily Mean Values of Approval/Sentiment |                                 |                      |                                          |                               |                    |                                          |                               |                    |
|-----------------------------------------------------------------------------------------------------------|---------------------------------|----------------------|------------------------------------------|-------------------------------|--------------------|------------------------------------------|-------------------------------|--------------------|
|                                                                                                           |                                 | Smoothed             |                                          |                               |                    | Daily                                    |                               |                    |
|                                                                                                           |                                 | Twitter<br>Sentiment | Crossed<br>Subgroup<br>Model<br>Approval | Subgroup<br>Model<br>Approval | Global<br>Approval | Crossed<br>Subgroup<br>Model<br>Approval | Subgroup<br>Model<br>Approval | Global<br>Approval |
| Daily                                                                                                     | Twitter Sentiment               | .70                  | .61                                      | .56                           | .46                | .59                                      | .53                           | .44                |
|                                                                                                           | Global Approval                 | .62                  | .81                                      | .83                           | .93                | .87                                      | .89                           |                    |
|                                                                                                           | Subgroup Model Approval         | .75                  | .91                                      | .92                           | .86                | .95                                      |                               |                    |
|                                                                                                           | Crossed Subgroup Model Approval | .76                  | .89                                      | .90                           | .83                |                                          |                               |                    |
| Smoothed                                                                                                  | Global Approval                 | .67                  | .87                                      | .89                           |                    |                                          |                               |                    |
|                                                                                                           | Subgroup Model Approval         | .82                  | .98                                      |                               |                    |                                          |                               |                    |
|                                                                                                           | Crossed Subgroup Model Approval | .90                  |                                          |                               |                    |                                          |                               |                    |

Table D2 - Non-negative least squares predictors using daily means for approval/sentiment with single demographic group predictors

|                                   | Prop. of Resamples | Avg. Coef. | N of Respondents in Category | Prop. of all Respondents |
|-----------------------------------|--------------------|------------|------------------------------|--------------------------|
| Lean Democrat                     | 100.0%             | .17        | 125015                       | 13.3%                    |
| Republican                        | 100.0%             | .13        | 285140                       | 30.3%                    |
| Less than high school diploma     | 99.6%              | .07        | 62185                        | 6.6%                     |
| Post graduate work or degree      | 98.9%              | .07        | 201266                       | 21.4%                    |
| Black                             | 99.9%              | .07        | 79009                        | 8.4%                     |
| Independent, no lean              | 96.0%              | .04        | 88638                        | 9.4%                     |
| Other                             | 96.5%              | .04        | 25753                        | 2.7%                     |
| Hispanic                          | 72.1%              | .02        | 62065                        | 6.6%                     |
| age1824                           | 69.9%              | .02        | 62190                        | 6.6%                     |
| \$12,000 to \$23,999              | 52.7%              | .01        | 112013                       | 11.9%                    |
| age75up                           | 48.9%              | .01        | 137537                       | 14.6%                    |
| \$36,000 to \$47,999              | 52.7%              | .01        | 118623                       | 12.6%                    |
| Democrat                          | 39.1%              | .008       | 306555                       | 32.6%                    |
| Asian                             | 46.6%              | .007       | 19418                        | 2.1%                     |
| Employed Full Time -Self-         | 28.8%              | .006       | 112527                       | 12.0%                    |
| Employed Part Time, Do Not Want   | 20.1%              | .004       | 164049                       | 17.4%                    |
| \$24,000 to \$35,999              | 22.0%              | .003       | 121292                       | 12.9%                    |
| Unemployed                        | 17.2%              | .002       | 97382                        | 10.3%                    |
| Employed Part Time, Want Full Tim | 14.3%              | .002       | 104419                       | 11.1%                    |
| White                             | 5.6%               | .002       | 755240                       | 80.2%                    |
| Midwest                           | 9.1%               | .001       | 208800                       | 22.2%                    |
| \$90,000 to \$119,999             | 6.1%               | .0007      | 84468                        | 9.0%                     |
| \$6,000 to \$11,999               | 5.0%               | .0005      | 54265                        | 5.8%                     |
| West                              | 3.3%               | .0004      | 218957                       | 23.3%                    |
| \$720 to \$5,999                  | 3.5%               | .0003      | 20760                        | 2.2%                     |
| age5564                           | 2.1%               | .0002      | 197077                       | 20.9%                    |
| \$48,000 to \$59,999              | 1.7%               | .0002      | 112601                       | 12.0%                    |
| age2534                           | 1.7%               | .0001      | 92657                        | 9.8%                     |
| age4554                           | 1.3%               | .0001      | 167388                       | 17.8%                    |
| Some college                      | 1.1%               | .0001      | 217357                       | 23.1%                    |
| \$60,000 to \$89,999              | 1.2%               | .0001      | 156531                       | 16.6%                    |
| Under \$720                       | 1.5%               | .00010     | 19652                        | 2.1%                     |
| Female                            | 0.6%               | .00008     | 472484                       | 50.2%                    |
| age6574                           | 0.4%               | .00004     | 163833                       | 17.4%                    |
| College graduate                  | 0.3%               | .00003     | 203740                       | 21.6%                    |
| High school degree or diploma     | 0.3%               | .00003     | 168657                       | 17.9%                    |
| Lean Republican                   | 0.1%               | .00001     | 136137                       | 14.5%                    |
| Technical/Vocational school       | 0.07%              | .000005    | 88280                        | 9.4%                     |
| age3544                           | 0.02%              | .0000006   | 120803                       | 12.8%                    |



Table D3 - Non-negative least squares predictors using daily means for approval/sentiment with crossed demographic group predictors (top 80 predictors)

|                                                                          | Prop. of Resamples | Avg. Coef. | N of Respondents in Category | Prop. of all Respondents |
|--------------------------------------------------------------------------|--------------------|------------|------------------------------|--------------------------|
| Less than high school diploma x \$60,000 to \$89,999                     | 99.4%              | .06        | 3845                         | 0.4%                     |
| Black x \$24,000 to \$35,999                                             | 99.6%              | .05        | 11236                        | 1.2%                     |
| Some college x Black                                                     | 99.0%              | .05        | 20068                        | 2.1%                     |
| Asian x Employed Part Time, Want Full Time                               | 92.0%              | .03        | 2154                         | 0.2%                     |
| Female x Post graduate work or degree                                    | 82.5%              | .03        | 94478                        | 10.0%                    |
| age2534 x Less than high school diploma                                  | 93.4%              | .03        | 6259                         | 0.7%                     |
| Republican x Less than high school diploma                               | 85.6%              | .03        | 14227                        | 1.5%                     |
| College graduate x \$720 to \$5,999                                      | 88.5%              | .03        | 2378                         | 0.3%                     |
| Lean Democrat x Unemployed                                               | 87.9%              | .03        | 13417                        | 1.4%                     |
| age1824 x Technical/Vocational school                                    | 88.8%              | .03        | 5196                         | 0.6%                     |
| Lean Democrat x Under \$720                                              | 86.5%              | .02        | 2972                         | 0.3%                     |
| age1824 x Asian                                                          | 86.2%              | .02        | 3492                         | 0.4%                     |
| Lean Democrat x College graduate                                         | 78.3%              | .02        | 26851                        | 2.9%                     |
| Post graduate work or degree x Employed Part Time, Do Not Want Full Time | 79.6%              | .02        | 34378                        | 3.7%                     |
| Black x \$48,000 to \$59,999                                             | 84.1%              | .02        | 8461                         | 0.9%                     |
| age6574 x Other                                                          | 80.0%              | .02        | 3066                         | 0.3%                     |
| Other x \$60,000 to \$89,999                                             | 79.1%              | .02        | 3607                         | 0.4%                     |
| age75up x Other                                                          | 75.1%              | .02        | 2023                         | 0.2%                     |
| age5564 x Lean Democrat                                                  | 74.3%              | .02        | 25175                        | 2.7%                     |
| age1824 x Lean Republican                                                | 79.2%              | .02        | 8683                         | 0.9%                     |
| Lean Republican x Less than high school diploma                          | 80.2%              | .02        | 8085                         | 0.9%                     |
| Lean Democrat x \$90,000 to \$119,999                                    | 72.9%              | .02        | 10844                        | 1.2%                     |
| age2534 x Other                                                          | 76.5%              | .02        | 3640                         | 0.4%                     |
| Republican x High school degree or diploma                               | 45.7%              | .02        | 51092                        | 5.4%                     |
| Independent, no lean x Employed Part Time, Do Not Want Full Time         | 75.2%              | .02        | 13920                        | 1.5%                     |
| Post graduate work or degree x \$36,000 to \$47,999                      | 72.9%              | .02        | 20066                        | 2.1%                     |
| age75up x Post graduate work or degree                                   | 68.1%              | .02        | 25420                        | 2.7%                     |
| Lean Democrat x \$36,000 to \$47,999                                     | 67.2%              | .02        | 15612                        | 1.7%                     |
| age6574 x Lean Democrat                                                  | 66.2%              | .02        | 18735                        | 2.0%                     |
| age6574 x Hispanic                                                       | 75.2%              | .02        | 5436                         | 0.6%                     |
| age75up x Independent, no lean                                           | 68.3%              | .02        | 11540                        | 1.2%                     |
| Republican x \$90,000 to \$119,999                                       | 66.3%              | .02        | 28301                        | 3.0%                     |
| Lean Democrat x Other                                                    | 68.1%              | .02        | 4178                         | 0.4%                     |
| Hispanic x Employed Full Time -Self-                                     | 70.1%              | .02        | 5761                         | 0.6%                     |
| age5564 x Employed Part Time, Want Full Time                             | 73.4%              | .01        | 20304                        | 2.2%                     |
| High school degree or diploma x Black                                    | 69.5%              | .01        | 15858                        | 1.7%                     |
| age1824 x \$60,000 to \$89,999                                           | 68.2%              | .01        | 7497                         | 0.8%                     |
| age6574 x Asian                                                          | 58.8%              | .01        | 1562                         | 0.2%                     |
| age2534 x \$60,000 to \$89,999                                           | 66.5%              | .01        | 16671                        | 1.8%                     |
| Lean Democrat x Employed Full Time -Self-                                | 60.9%              | .01        | 13839                        | 1.5%                     |

Table D3 Cont. - Non-negative least squares predictors using daily means for approval/sentiment with crossed demographic group predictors (top 80 predictors)

|                                                    | Prop. of Resamples | Avg. Coef. | N of Respondents in Category | Prop. of all Respondents |
|----------------------------------------------------|--------------------|------------|------------------------------|--------------------------|
| Republican x Under \$720                           | 62.9%              | .01        | 4266                         | 0.5%                     |
| Republican x Employed Part Time, Want Full Time    | 62.5%              | .01        | 29213                        | 3.1%                     |
| Employed Full Time -Self- x \$90,000 to \$119,999  | 67.7%              | .01        | 10062                        | 1.1%                     |
| age3544 x \$24,000 to \$35,999                     | 67.2%              | .01        | 12775                        | 1.4%                     |
| Post graduate work or degree x \$6,000 to \$11,999 | 64.5%              | .01        | 3394                         | 0.4%                     |
| Other x Northeast                                  | 62.5%              | .01        | 3776                         | 0.4%                     |
| High school degree or diploma x \$120,000 and over | 62.3%              | .01        | 9972                         | 1.1%                     |
| Male x Less than high school diploma               | 56.6%              | .01        | 29348                        | 3.1%                     |
| Unemployed x \$720 to \$5,999                      | 59.6%              | .01        | 4236                         | 0.4%                     |
| Asian x \$36,000 to \$47,999                       | 53.3%              | .01        | 2080                         | 0.2%                     |
| Less than high school diploma x \$120,000 and over | 53.2%              | .01        | 1961                         | 0.2%                     |
| Lean Democrat x Post graduate work or degree       | 49.4%              | .01        | 29091                        | 3.1%                     |
| Less than high school diploma x Other              | 53.8%              | .01        | 2475                         | 0.3%                     |
| Lean Democrat x \$720 to \$5,999                   | 53.8%              | .01        | 3017                         | 0.3%                     |
| Republican x Northeast                             | 52.7%              | .01        | 44254                        | 4.7%                     |
| Other x \$6,000 to \$11,999                        | 53.6%              | .01        | 2262                         | 0.2%                     |
| age1824 x Republican                               | 56.8%              | .01        | 14366                        | 1.5%                     |
| Democrat x \$6,000 to \$11,999                     | 57.9%              | .01        | 21327                        | 2.3%                     |
| Other x South                                      | 52.7%              | .01        | 8565                         | 0.9%                     |
| age1824 x \$48,000 to \$59,999                     | 56.6%              | .01        | 6460                         | 0.7%                     |
| age5564 x Hispanic                                 | 55.4%              | .01        | 8331                         | 0.9%                     |
| Asian x Midwest                                    | 52.6%              | .010       | 2604                         | 0.3%                     |
| Unemployed x \$90,000 to \$119,999                 | 54.0%              | .009       | 4871                         | 0.5%                     |
| Post graduate work or degree x Other               | 51.0%              | .009       | 4534                         | 0.5%                     |
| age3544 x Black                                    | 54.6%              | .009       | 12329                        | 1.3%                     |
| Asian x \$24,000 to \$35,999                       | 49.7%              | .009       | 1931                         | 0.2%                     |
| South x \$12,000 to \$23,999                       | 46.8%              | .009       | 42075                        | 4.5%                     |
| Technical/Vocational school x \$6,000 to \$11,999  | 49.7%              | .009       | 5926                         | 0.6%                     |
| age3544 x \$6,000 to \$11,999                      | 51.5%              | .009       | 5225                         | 0.6%                     |
| Unemployed x \$120,000 and over                    | 52.1%              | .009       | 6577                         | 0.7%                     |
| Hispanic x \$6,000 to \$11,999                     | 50.4%              | .008       | 6572                         | 0.7%                     |
| Lean Democrat x Midwest                            | 43.5%              | .008       | 28888                        | 3.1%                     |
| Independent, no lean x \$24,000 to \$35,999        | 51.0%              | .008       | 11799                        | 1.3%                     |
| age5564 x \$12,000 to \$23,999                     | 49.0%              | .008       | 20104                        | 2.1%                     |
| age1824 x \$12,000 to \$23,999                     | 49.6%              | .008       | 9554                         | 1.0%                     |
| High school degree or diploma x \$720 to \$5,999   | 48.7%              | .008       | 5935                         | 0.6%                     |
| Technical/Vocational school x Under \$720          | 44.0%              | .008       | 2126                         | 0.2%                     |
| Democrat x Employed Full Time -Self-               | 47.6%              | .008       | 33367                        | 3.5%                     |
| Some college x Under \$720                         | 47.0%              | .008       | 3903                         | 0.4%                     |
| Black x \$120,000 and over                         | 52.3%              | .008       | 6980                         | 0.7%                     |

## Online Appendix E: Dates With Largest Deviations from Modeled Fit in Twitter

Table E1 - Events With Sentiment that Most Differed From Model

|    | Date     | Event                      | Daily Sentiment | Difference from fit |
|----|----------|----------------------------|-----------------|---------------------|
| 1  | 10/9/09  | Nobel Prize                | .083            | .080                |
| 2  | 10/10/09 | Nobel Prize                | .049            | .046                |
| 3  | 12/10/09 | Nobel Prize                | .033            | .033                |
| 4  | 8/4/10   | Birthday                   | .020            | .025                |
| 5  | 10/11/09 | Nobel Prize                | .028            | .025                |
| 6  | 8/4/11   | Birthday                   | .012            | .023                |
| 7  | 1/21/13  | Second Inaugural Address   | .014            | .021                |
| 8  | 3/28/11  | Libya speech               | .015            | .021                |
| 9  | 11/7/12  | Reelected                  | .018            | .020                |
| 10 | 5/9/12   | Suports Same Sex Marriage  | .014            | .019                |
| 11 | 12/29/09 | <b>Shoe bomber speech</b>  | -.021           | -.019               |
| 12 | 10/24/09 | <b>Swine Flu</b>           | -.017           | -.019               |
| 13 | 10/12/09 | Nobel Prize                | .021            | .018                |
| 14 | 1/22/13  | Second inaugural address   | .011            | .018                |
| 15 | 12/30/09 | <b>Camp Chapman Attack</b> | -.020           | -.018               |
| 16 | 4/28/13  | Correspondents' Dinner     | .004            | .017                |
| 17 | 10/5/11  | UNCLEAR                    | .011            | .017                |
| 18 | 1/2/10   | <b>Shoe bomber speech</b>  | -.019           | -.017               |
| 19 | 8/4/09   | Birthday                   | .017            | .017                |
| 20 | 12/11/09 | Nobel Prize                | .016            | .017                |
| 21 | 10/25/09 | <b>Swine Flu</b>           | -.014           | -.017               |
| 22 | 4/23/13  | <b>AP Twitter hack</b>     | -.029           | -.016               |
| 23 | 8/4/12   | Birthday                   | .009            | .016                |
| 24 | 11/17/11 | <b>UNCLEAR</b>             | -.021           | -.015               |
| 25 | 12/15/12 | <b>Sandy Hook</b>          | -.021           | -.015               |
| 26 | 7/9/13   | UNCLEAR                    | .006            | .015                |
| 27 | 1/20/12  | UNCLEAR                    | .012            | .014                |
| 28 | 8/5/11   | Birthday                   | .003            | .014                |
| 29 | 11/8/12  | Reelected                  | .012            | .014                |
| 30 | 3/20/09  | UNCLEAR                    | .016            | .014                |

Notes: Events were indetified by searching the news for what was happening on a particular day related to Obama. Bold events were negative shocks. Dates with UNCLEAR did not have a single relevant event that we were confident caused the shock.
